# Supplementary material
Source: PubMed Central journal article supplement (PMC4053077)

Project Name: Case Study 1

Normalization report by Normalyzer

Report created on: 2014-03-06

**Total intensity**

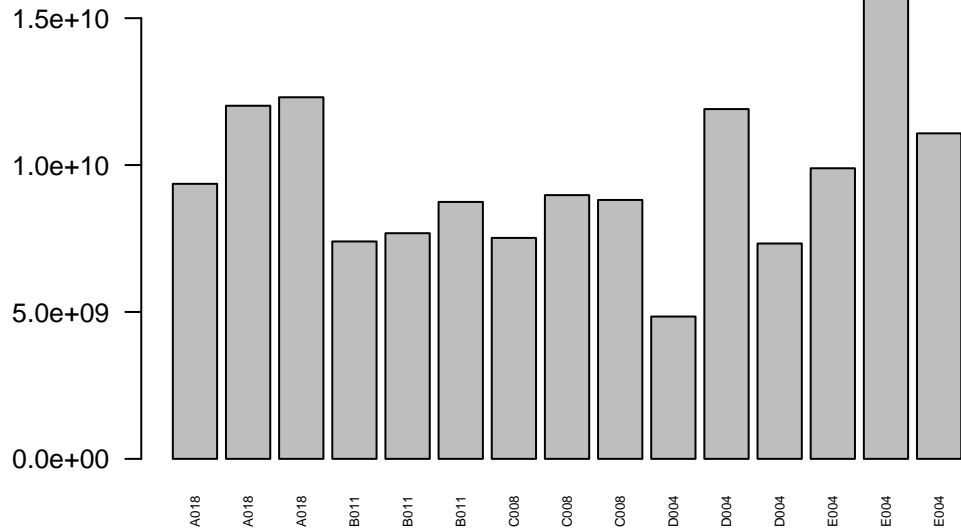

**Total missing**

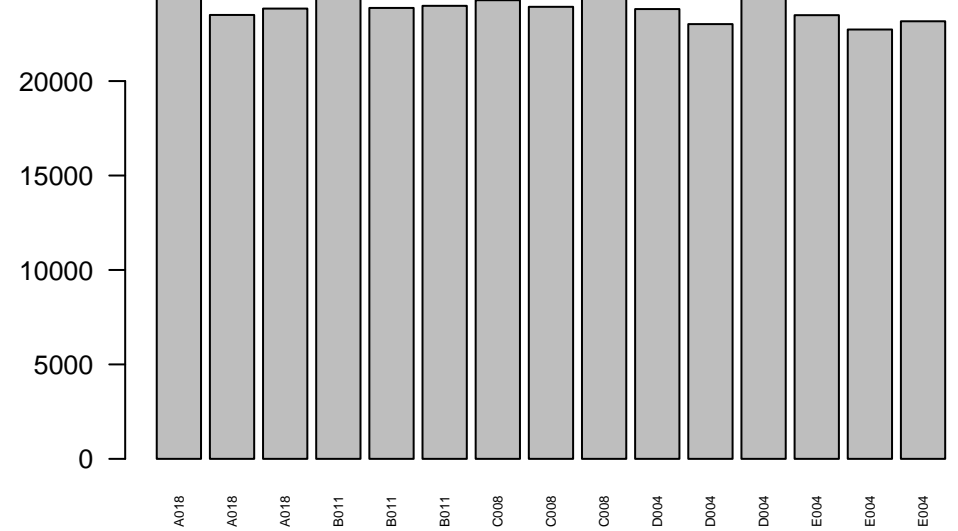

**Log2-MDS plot**

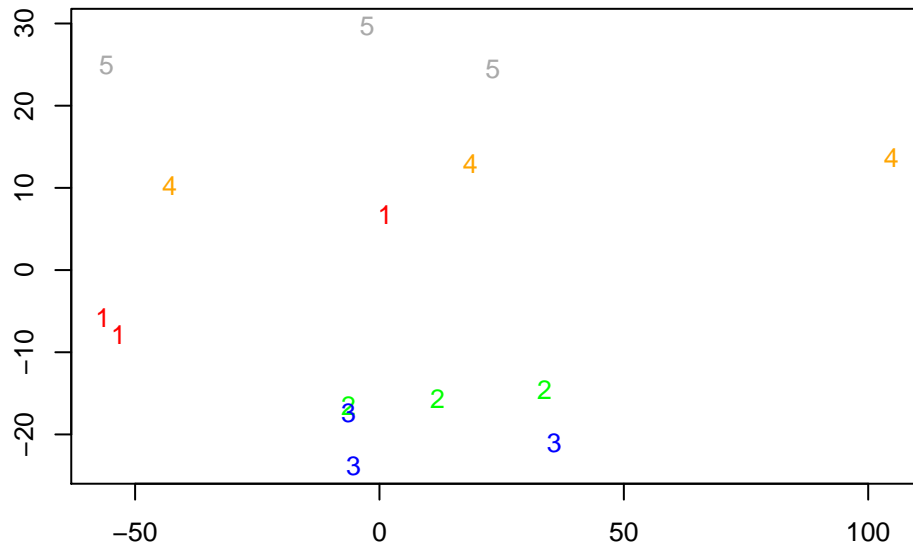

**%CV – Intragroup**

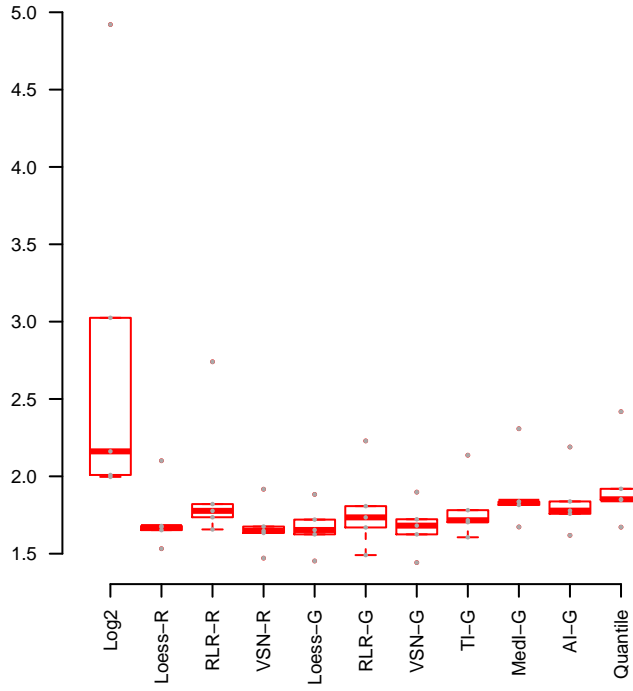

**MAD – Intragroup**

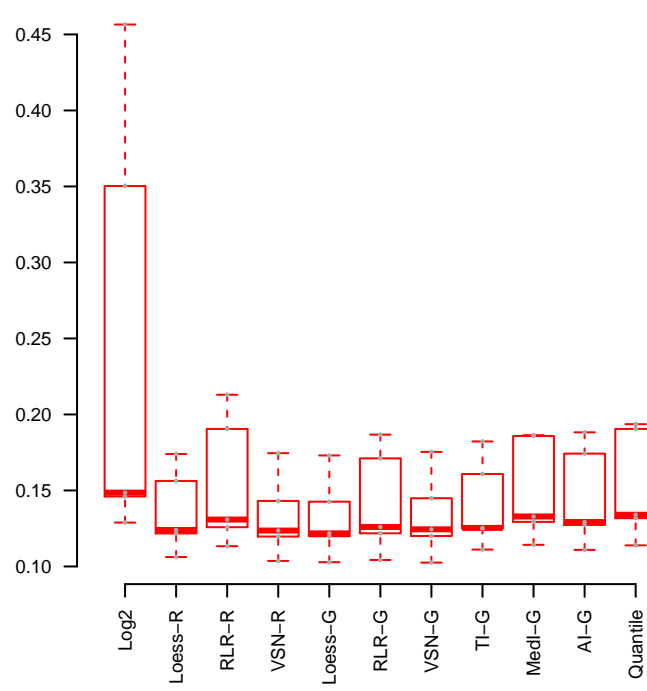

**PV – Intragroup**

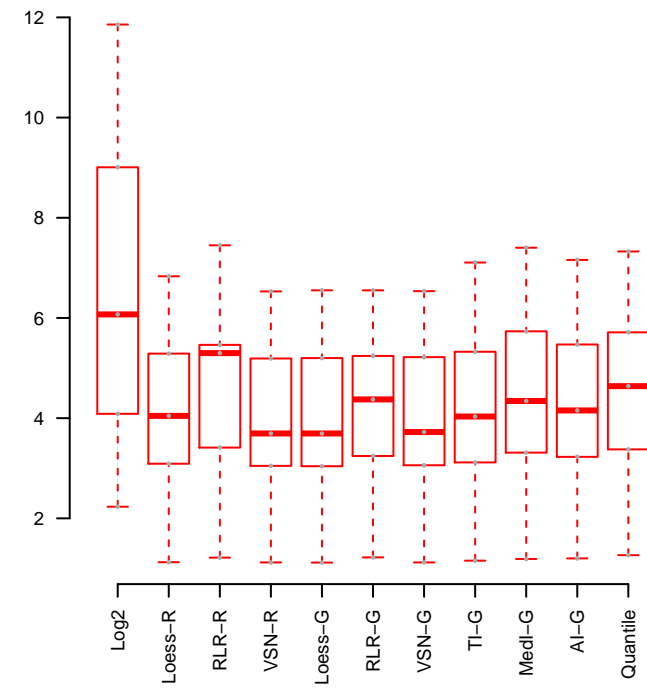

**%CV compared to log2**

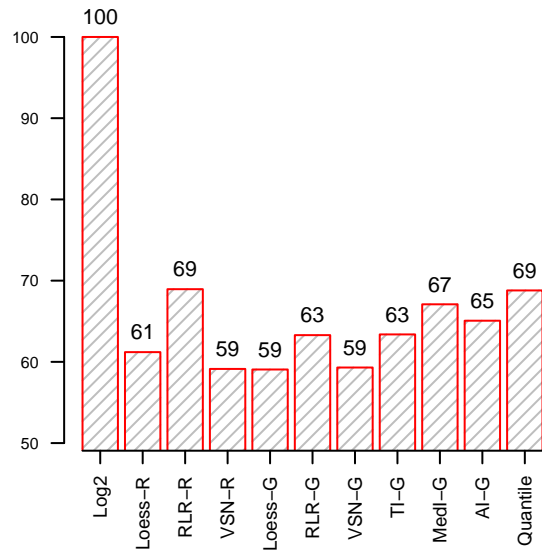

**%MAD compared to log2**

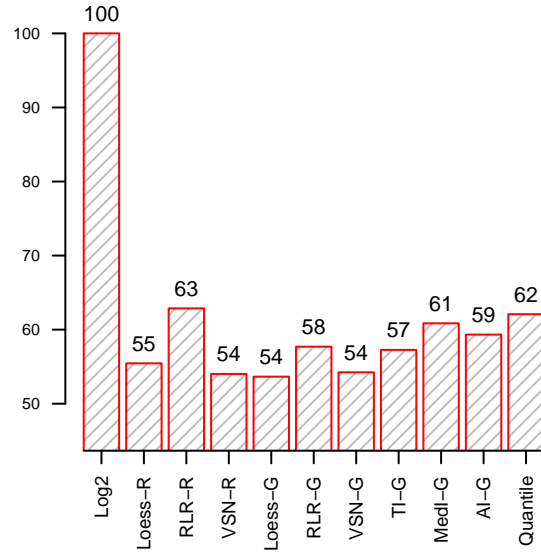

**%PV – compared to log2**

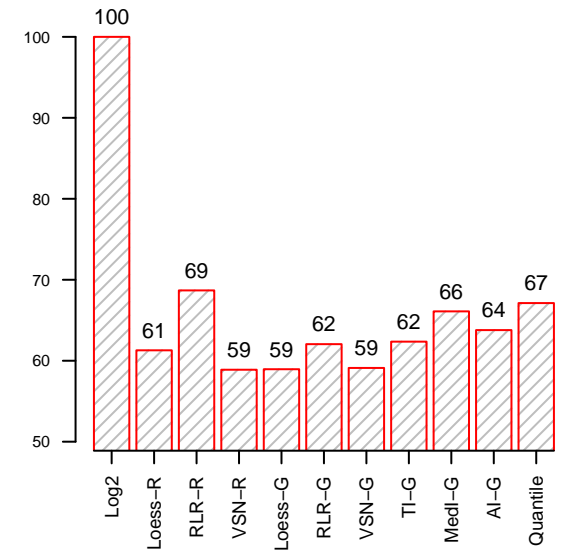

**Stable variables plot**

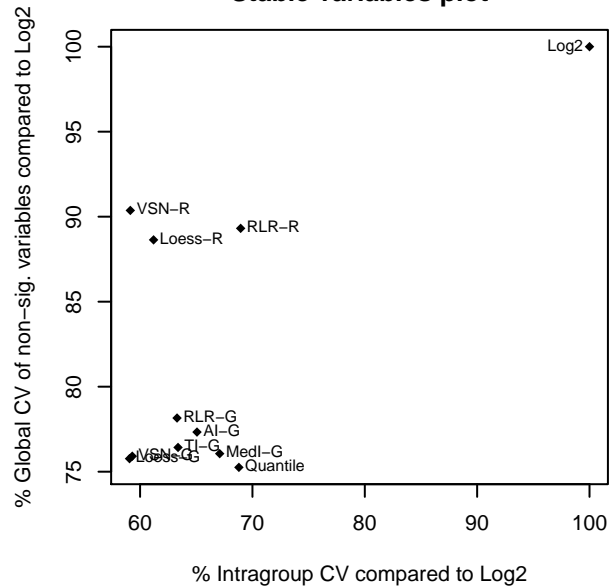

CV vs Raw Intensity plots

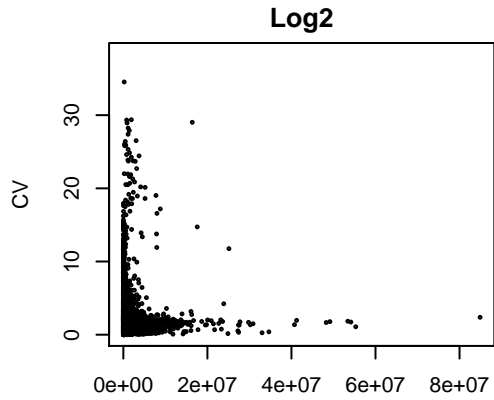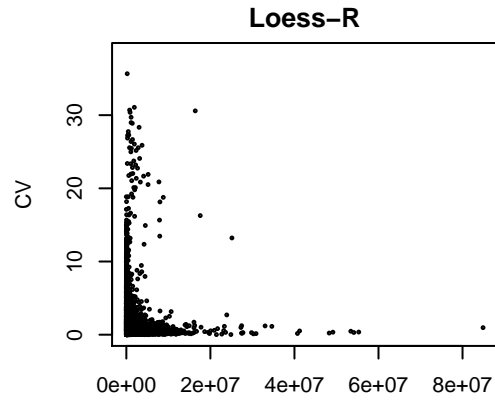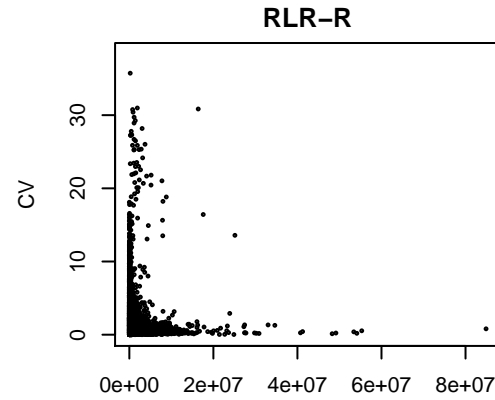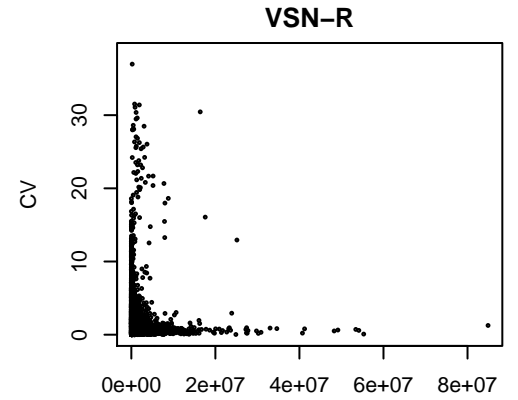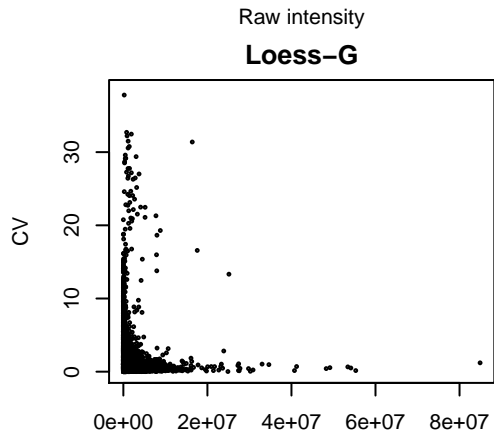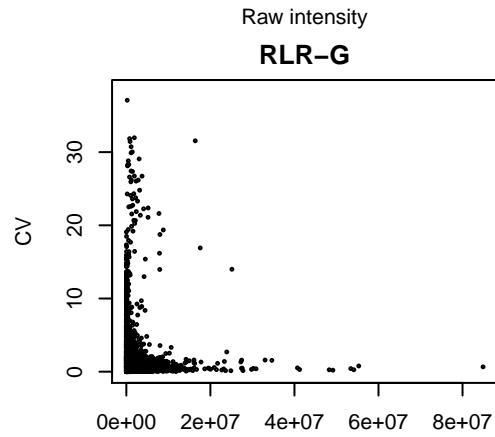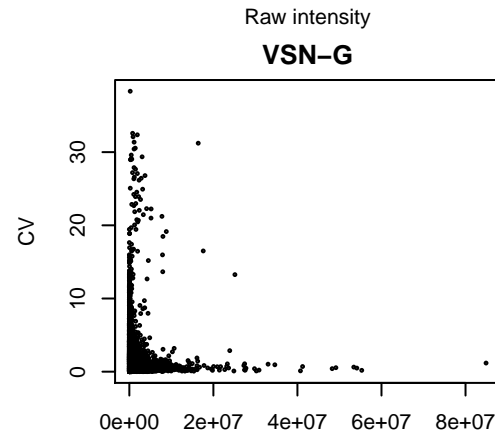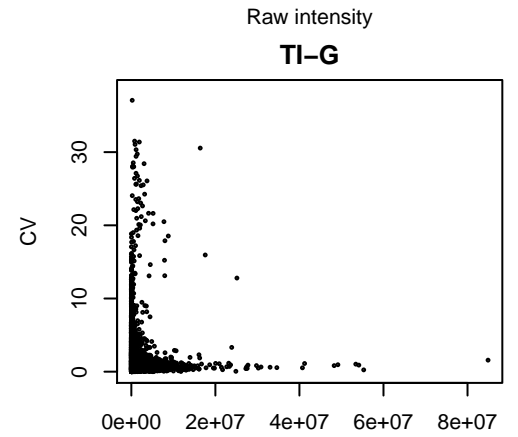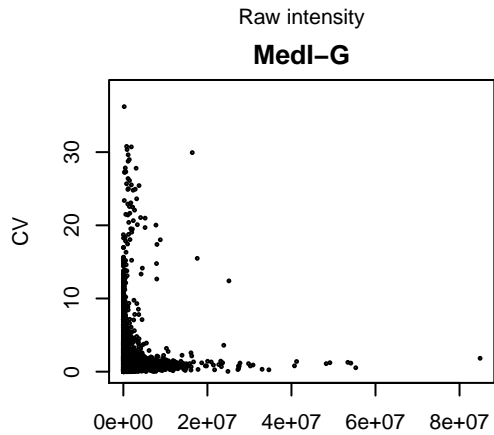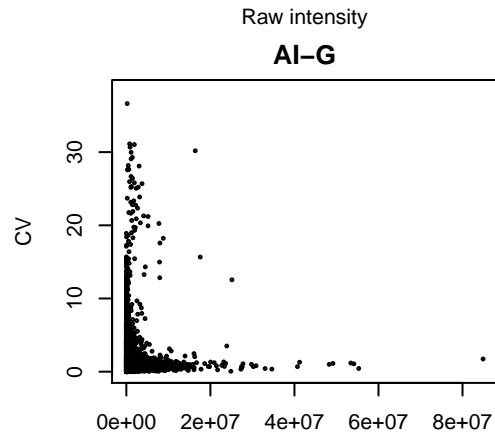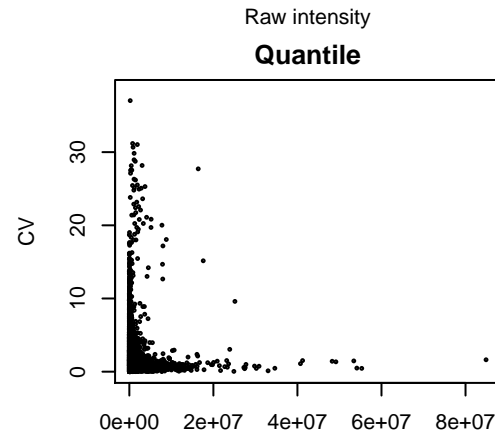

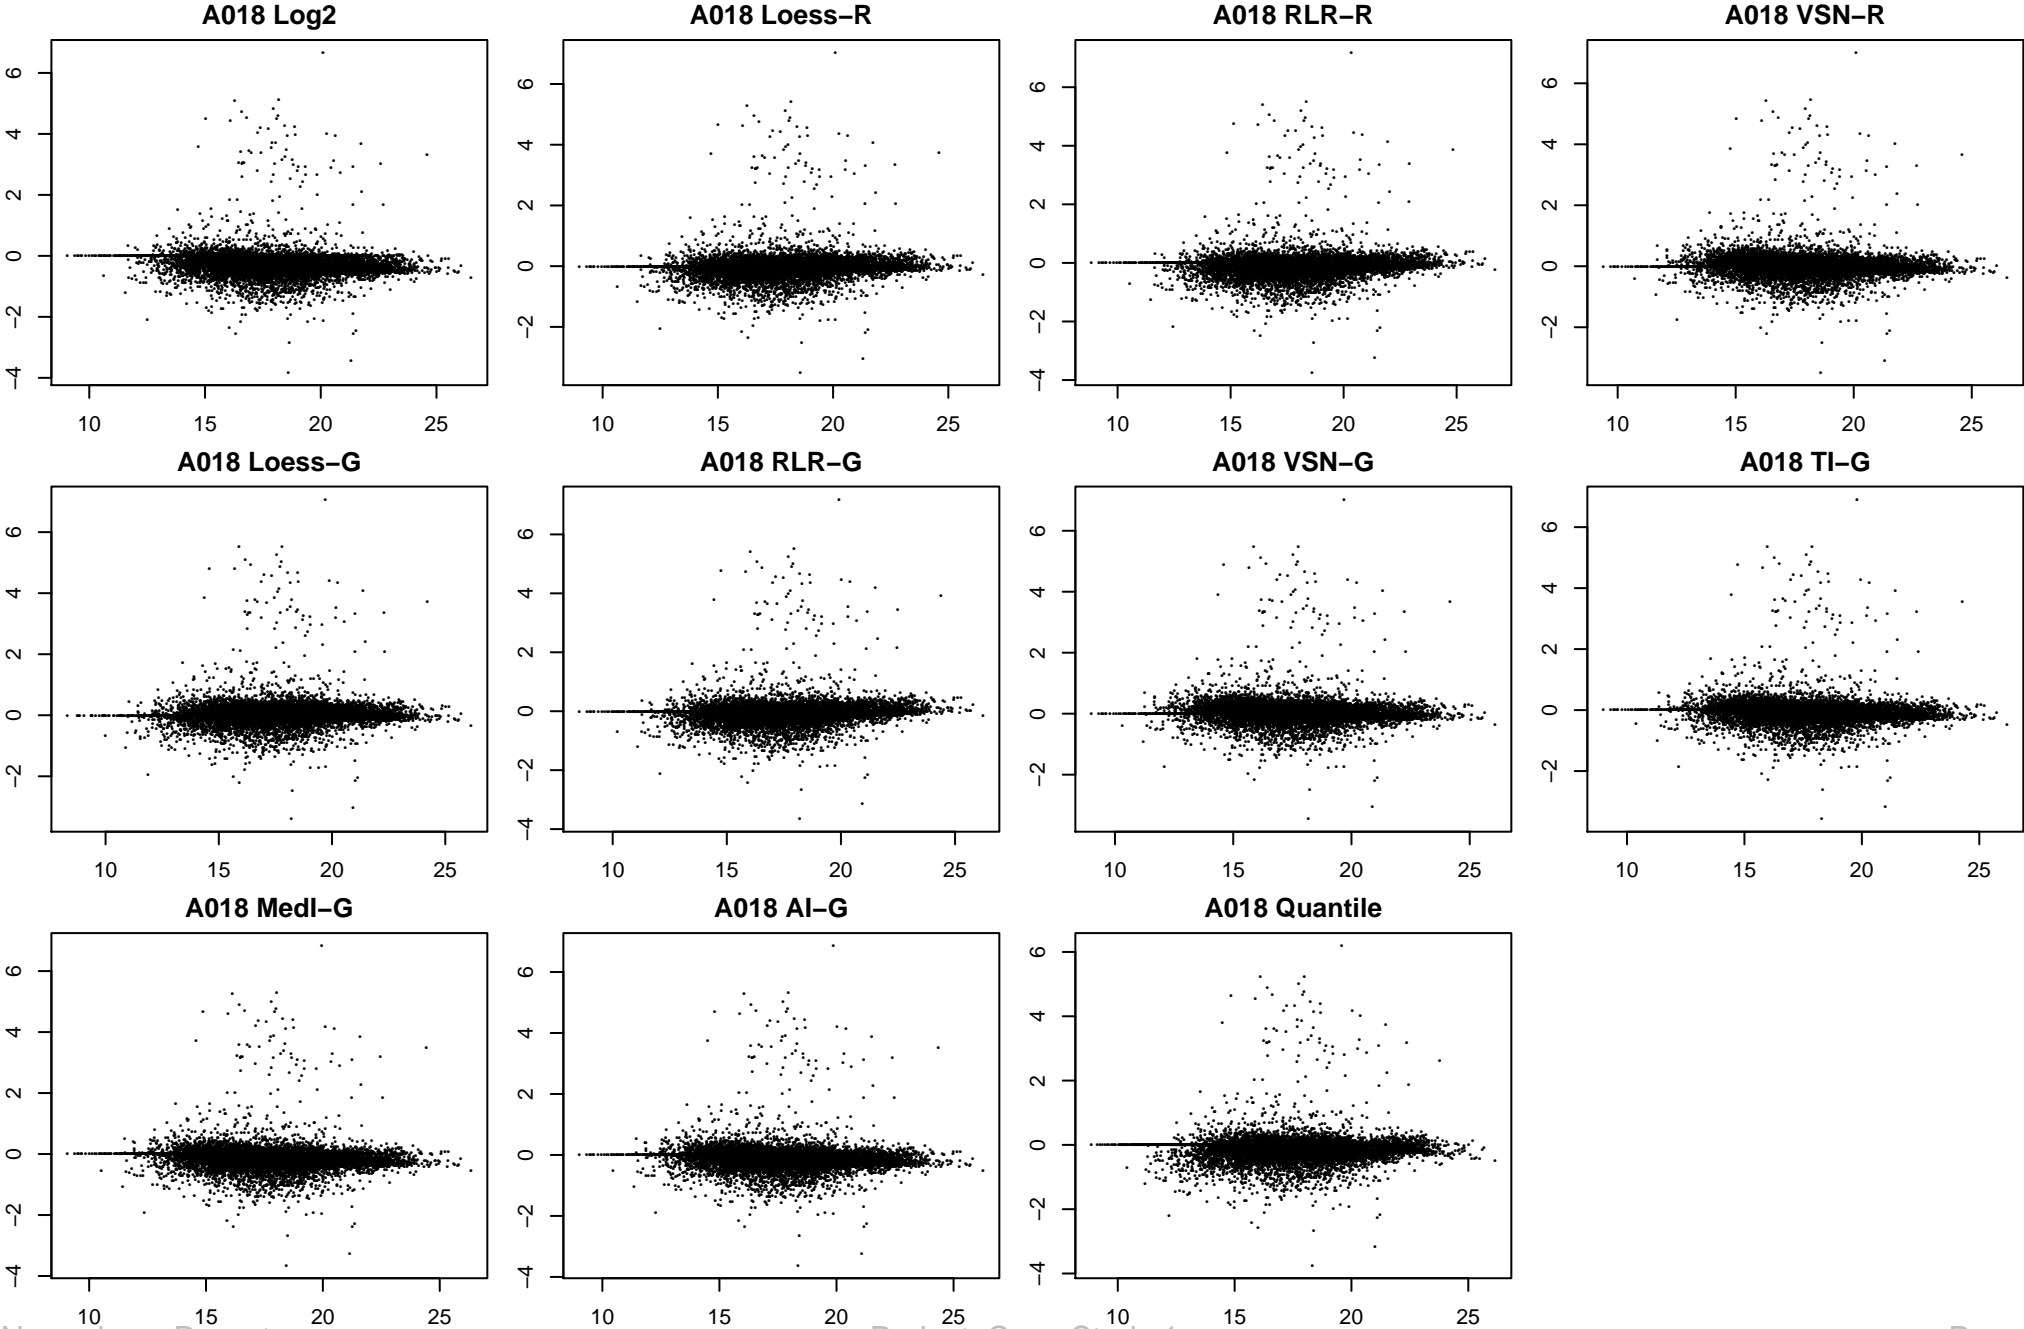

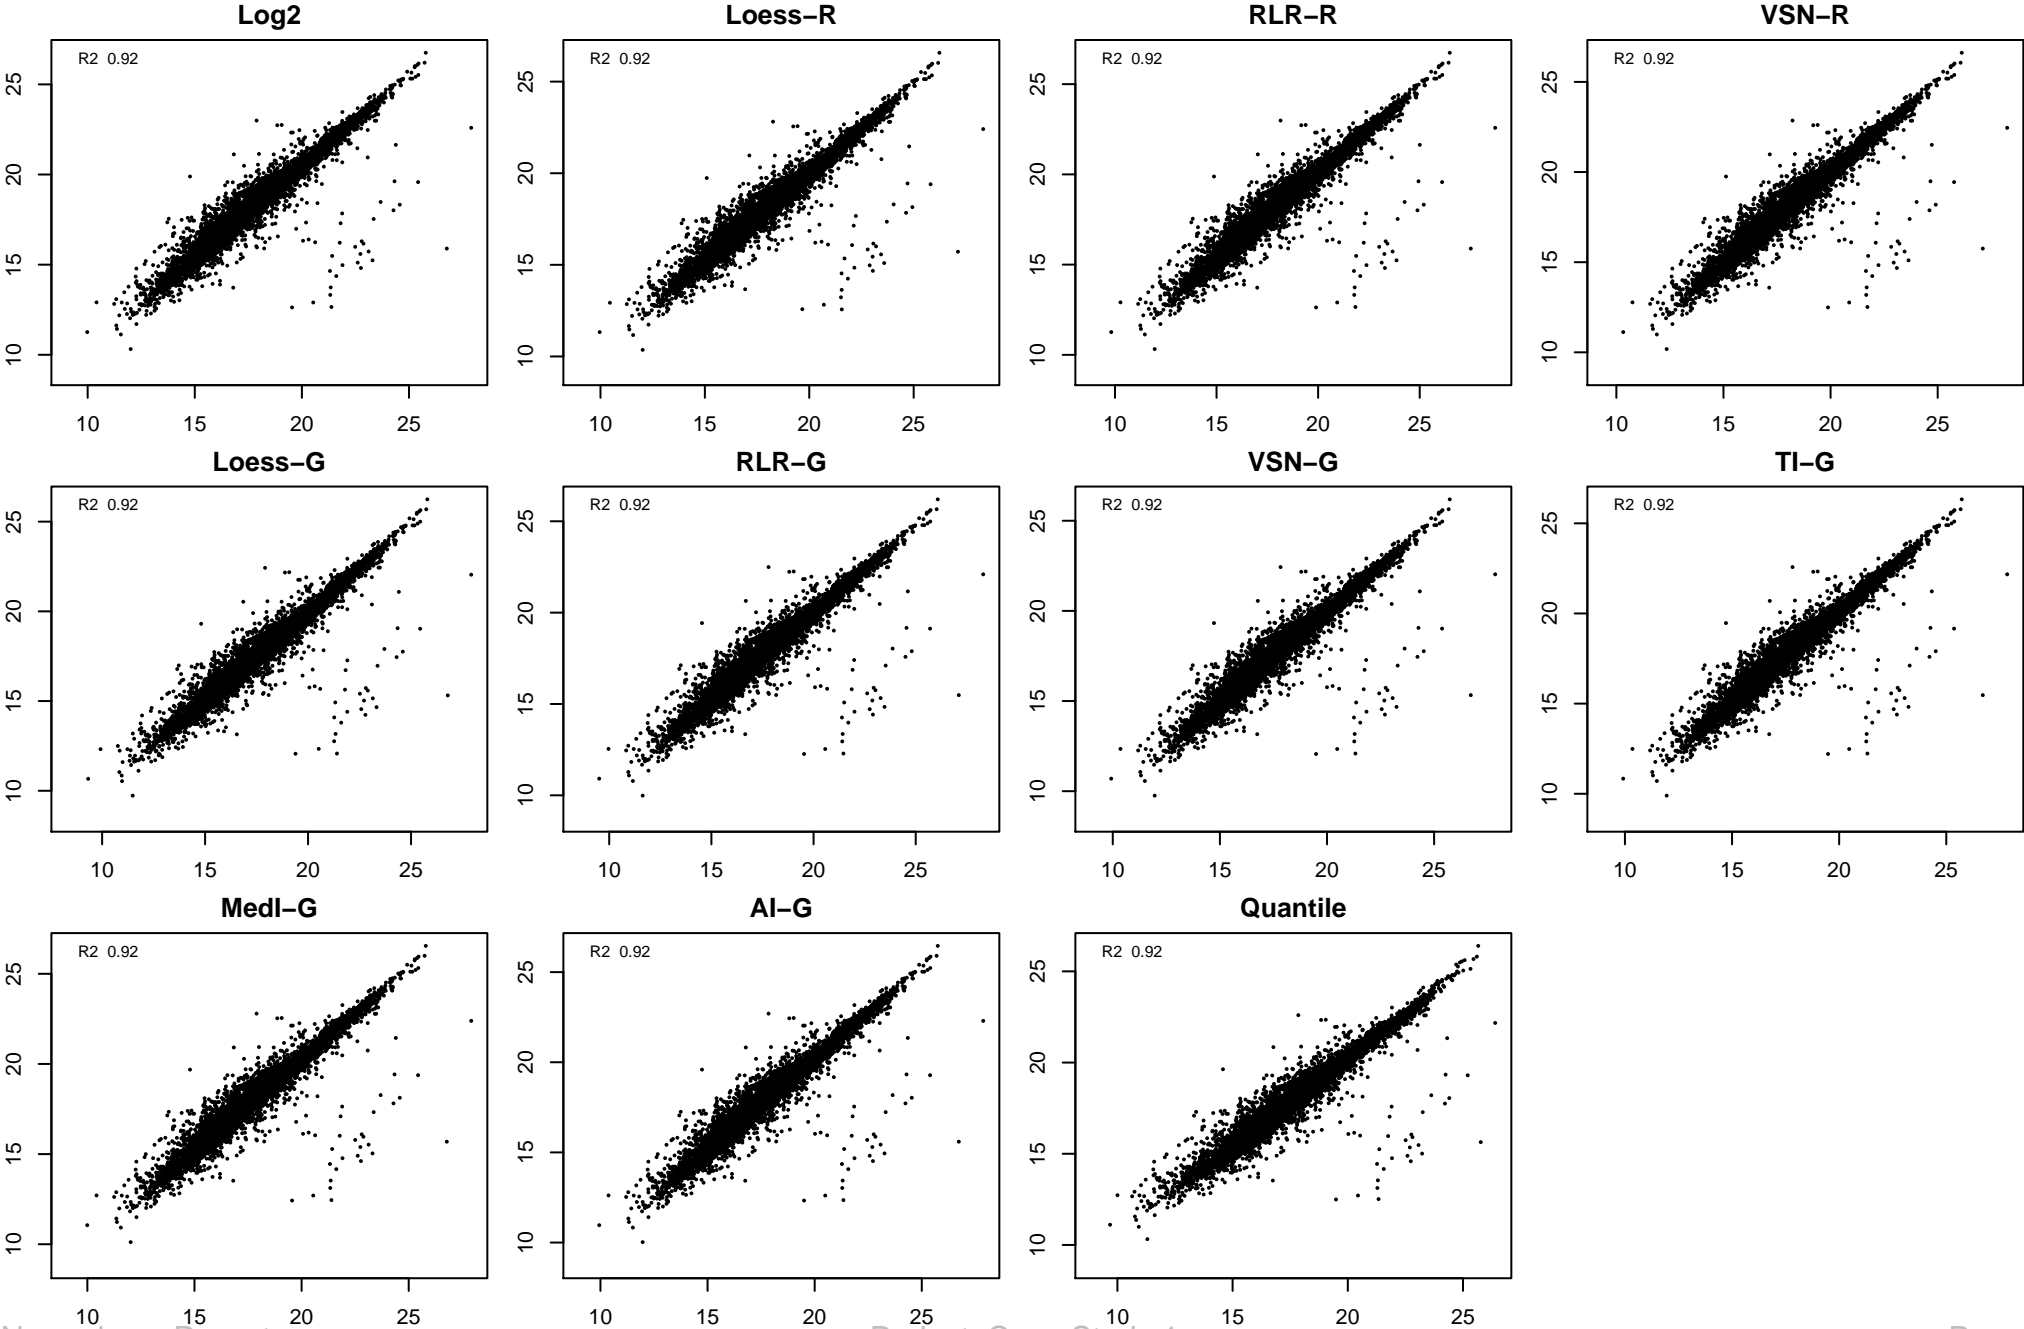

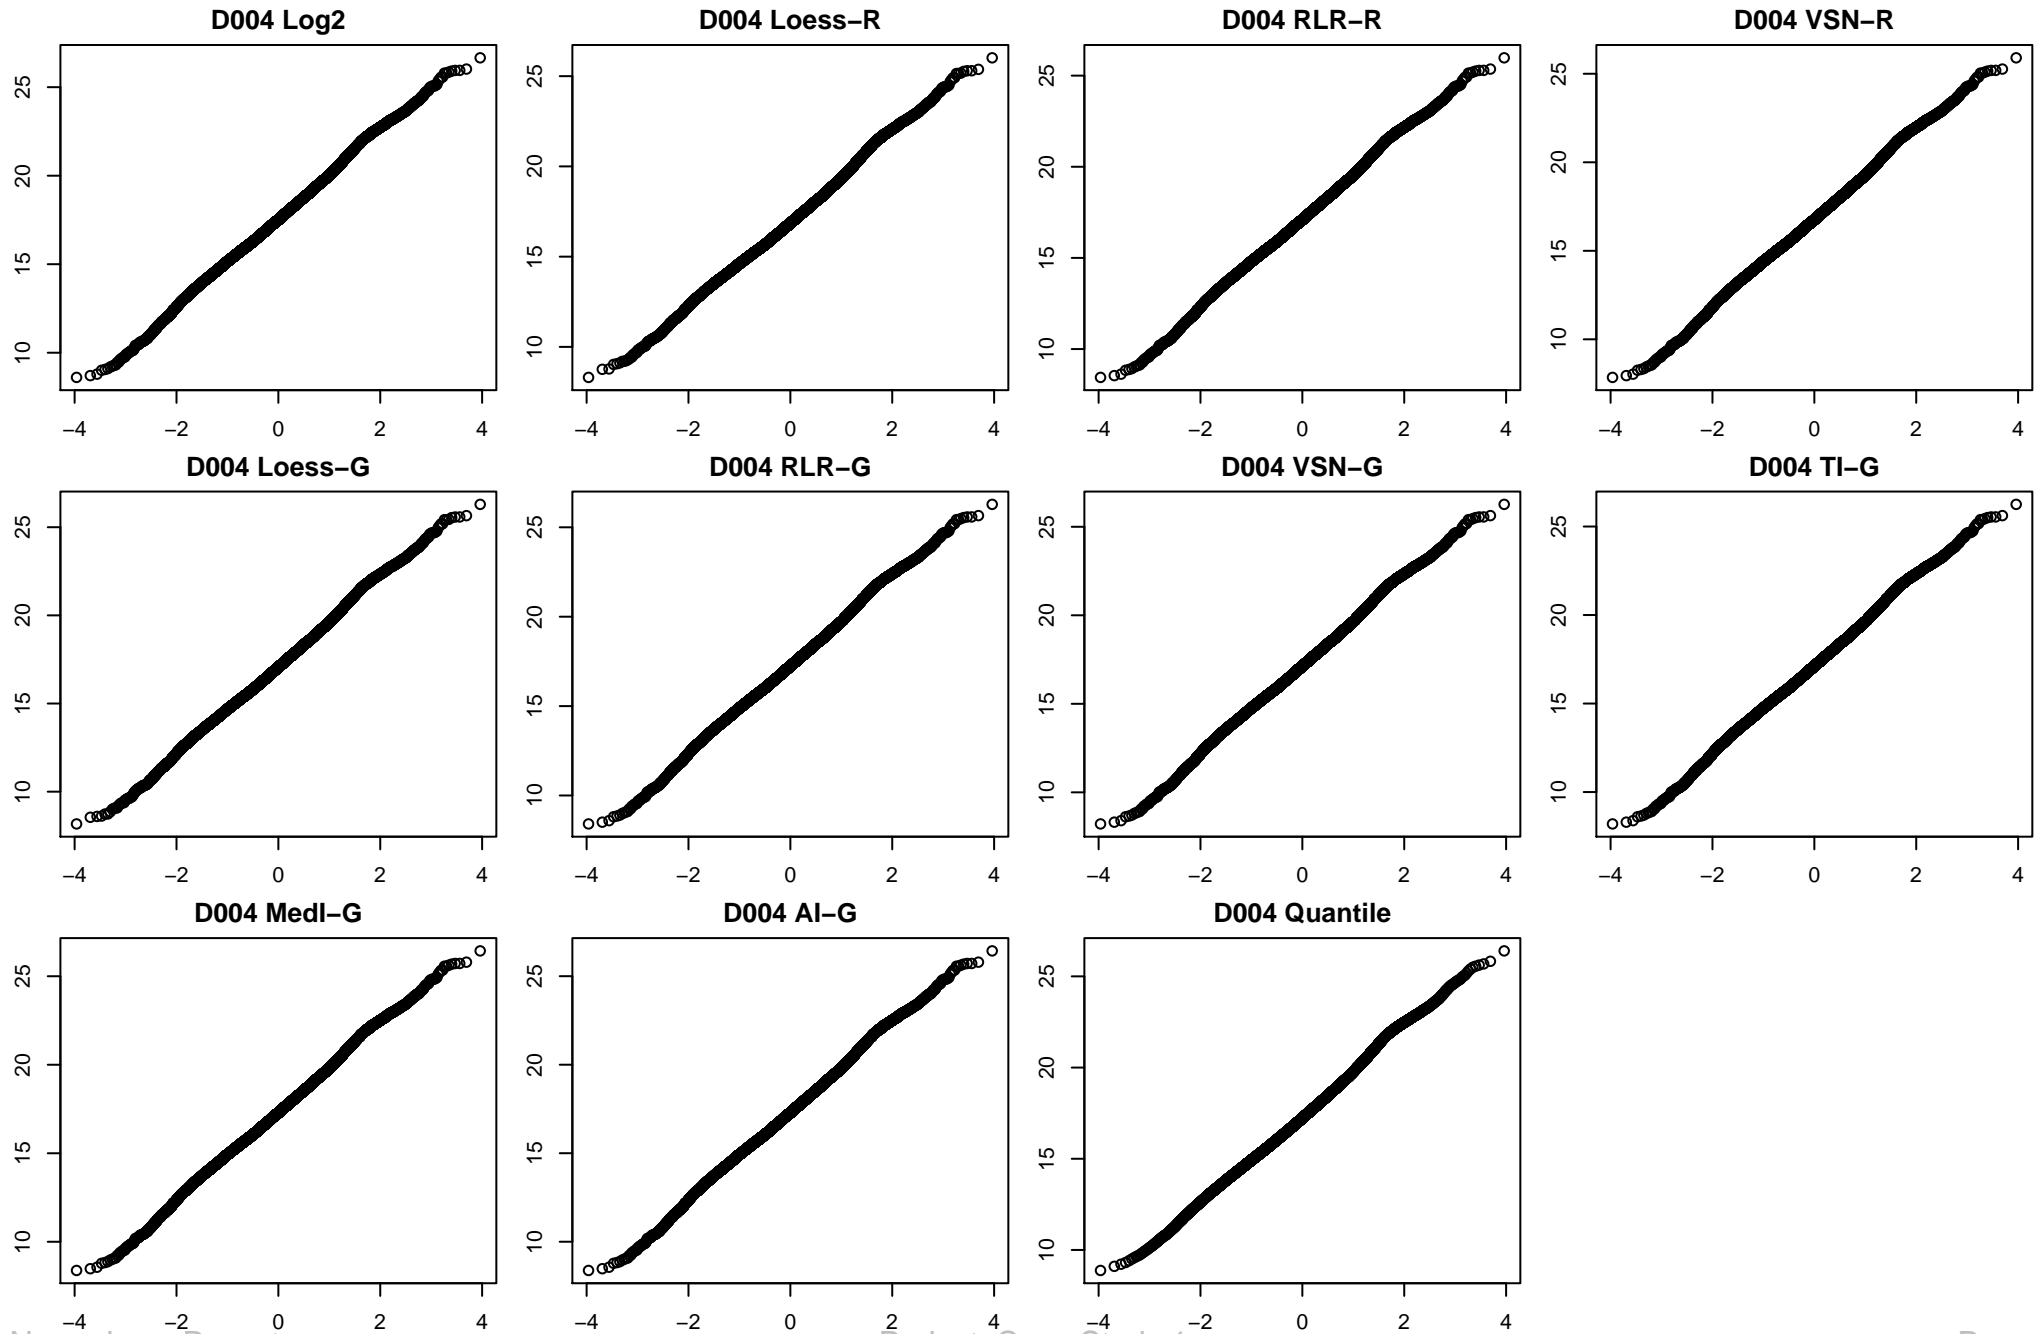



# Boxplots

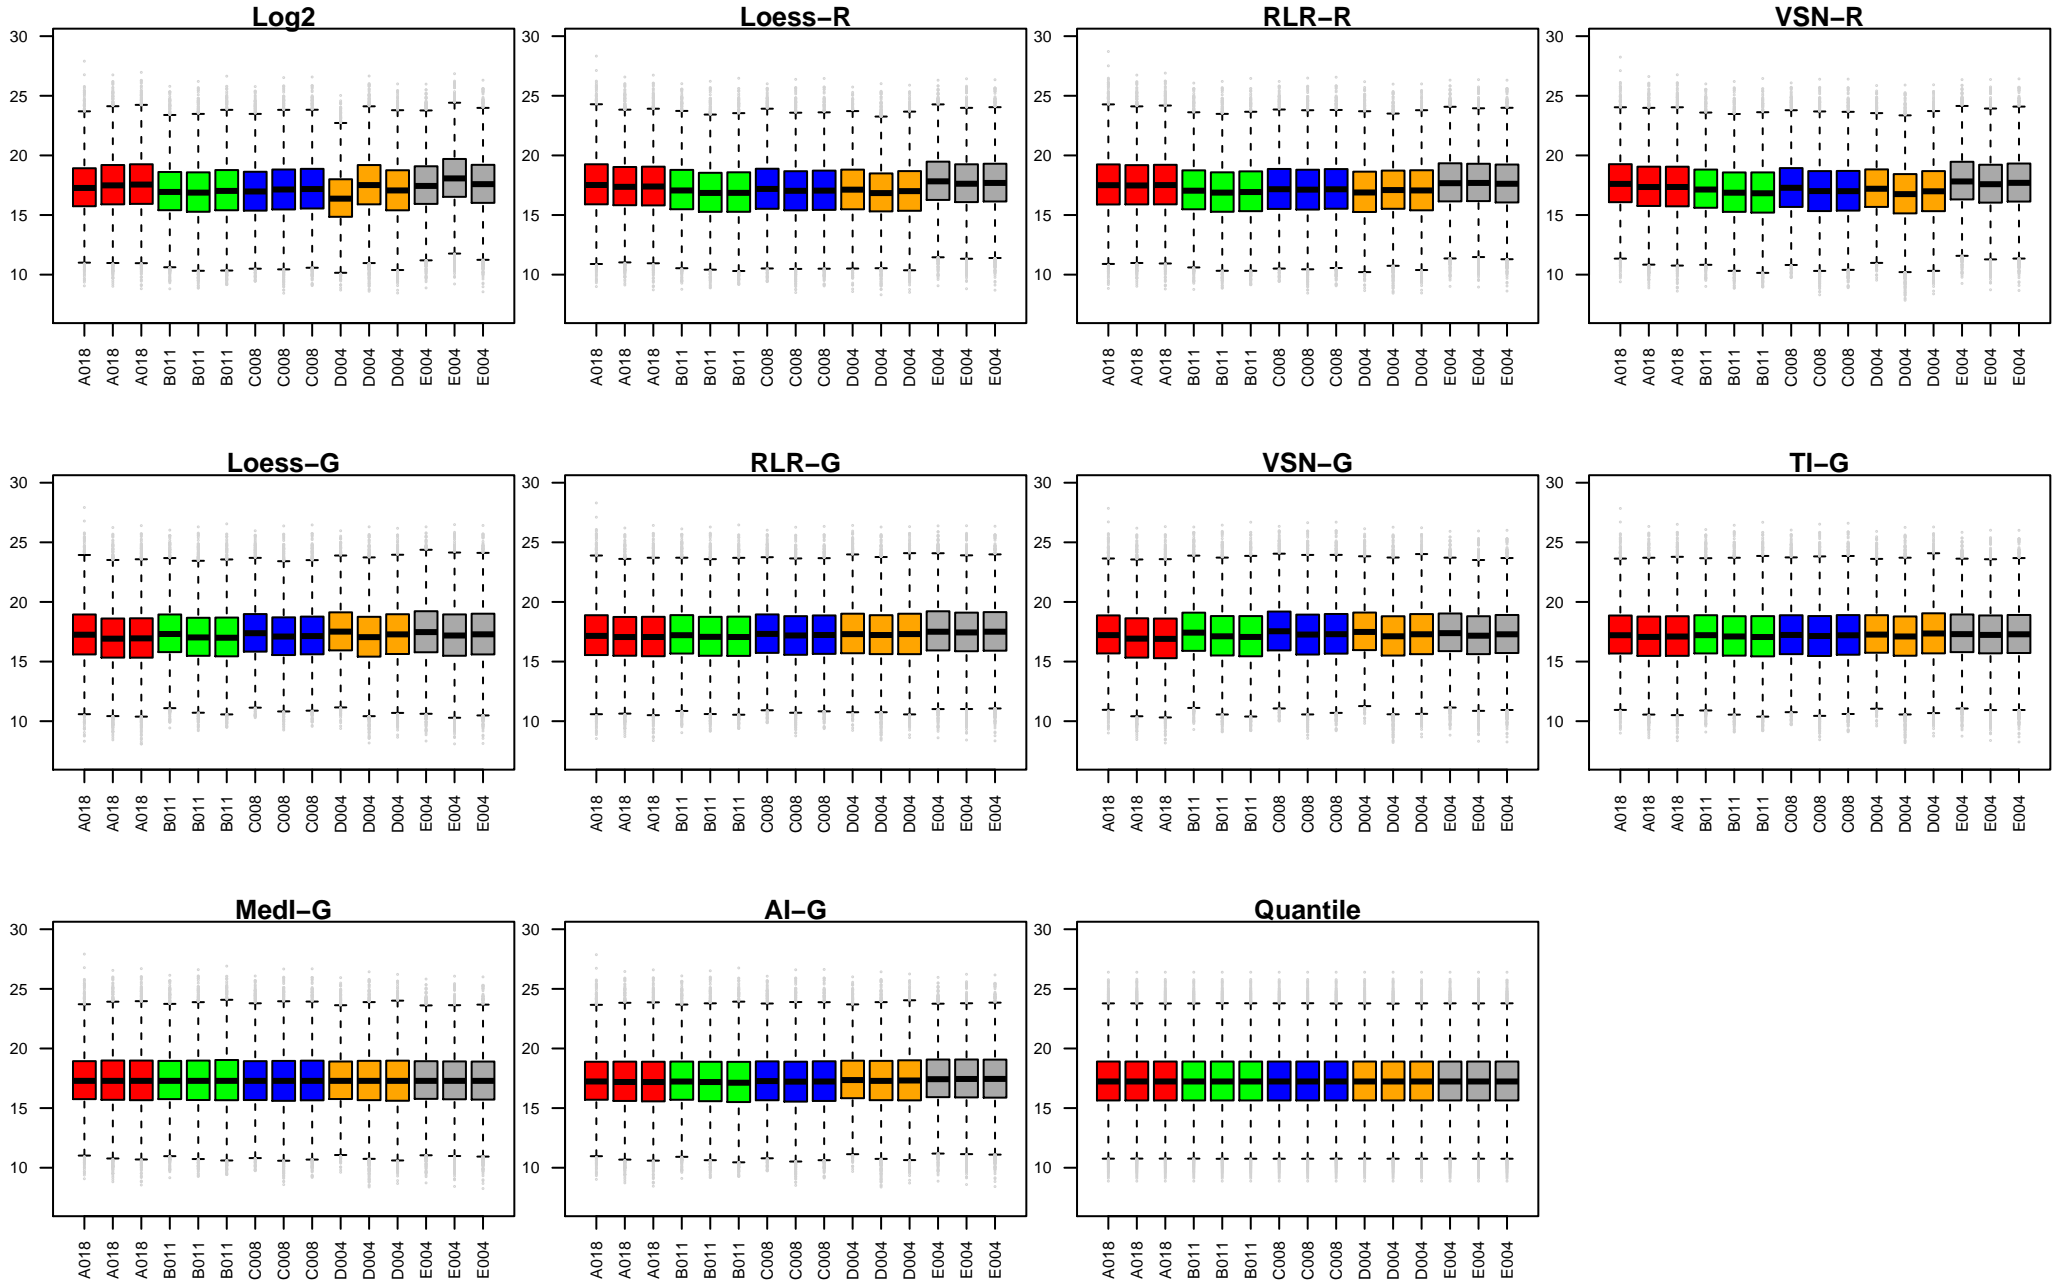

Relative Log Expression (RLE) plots

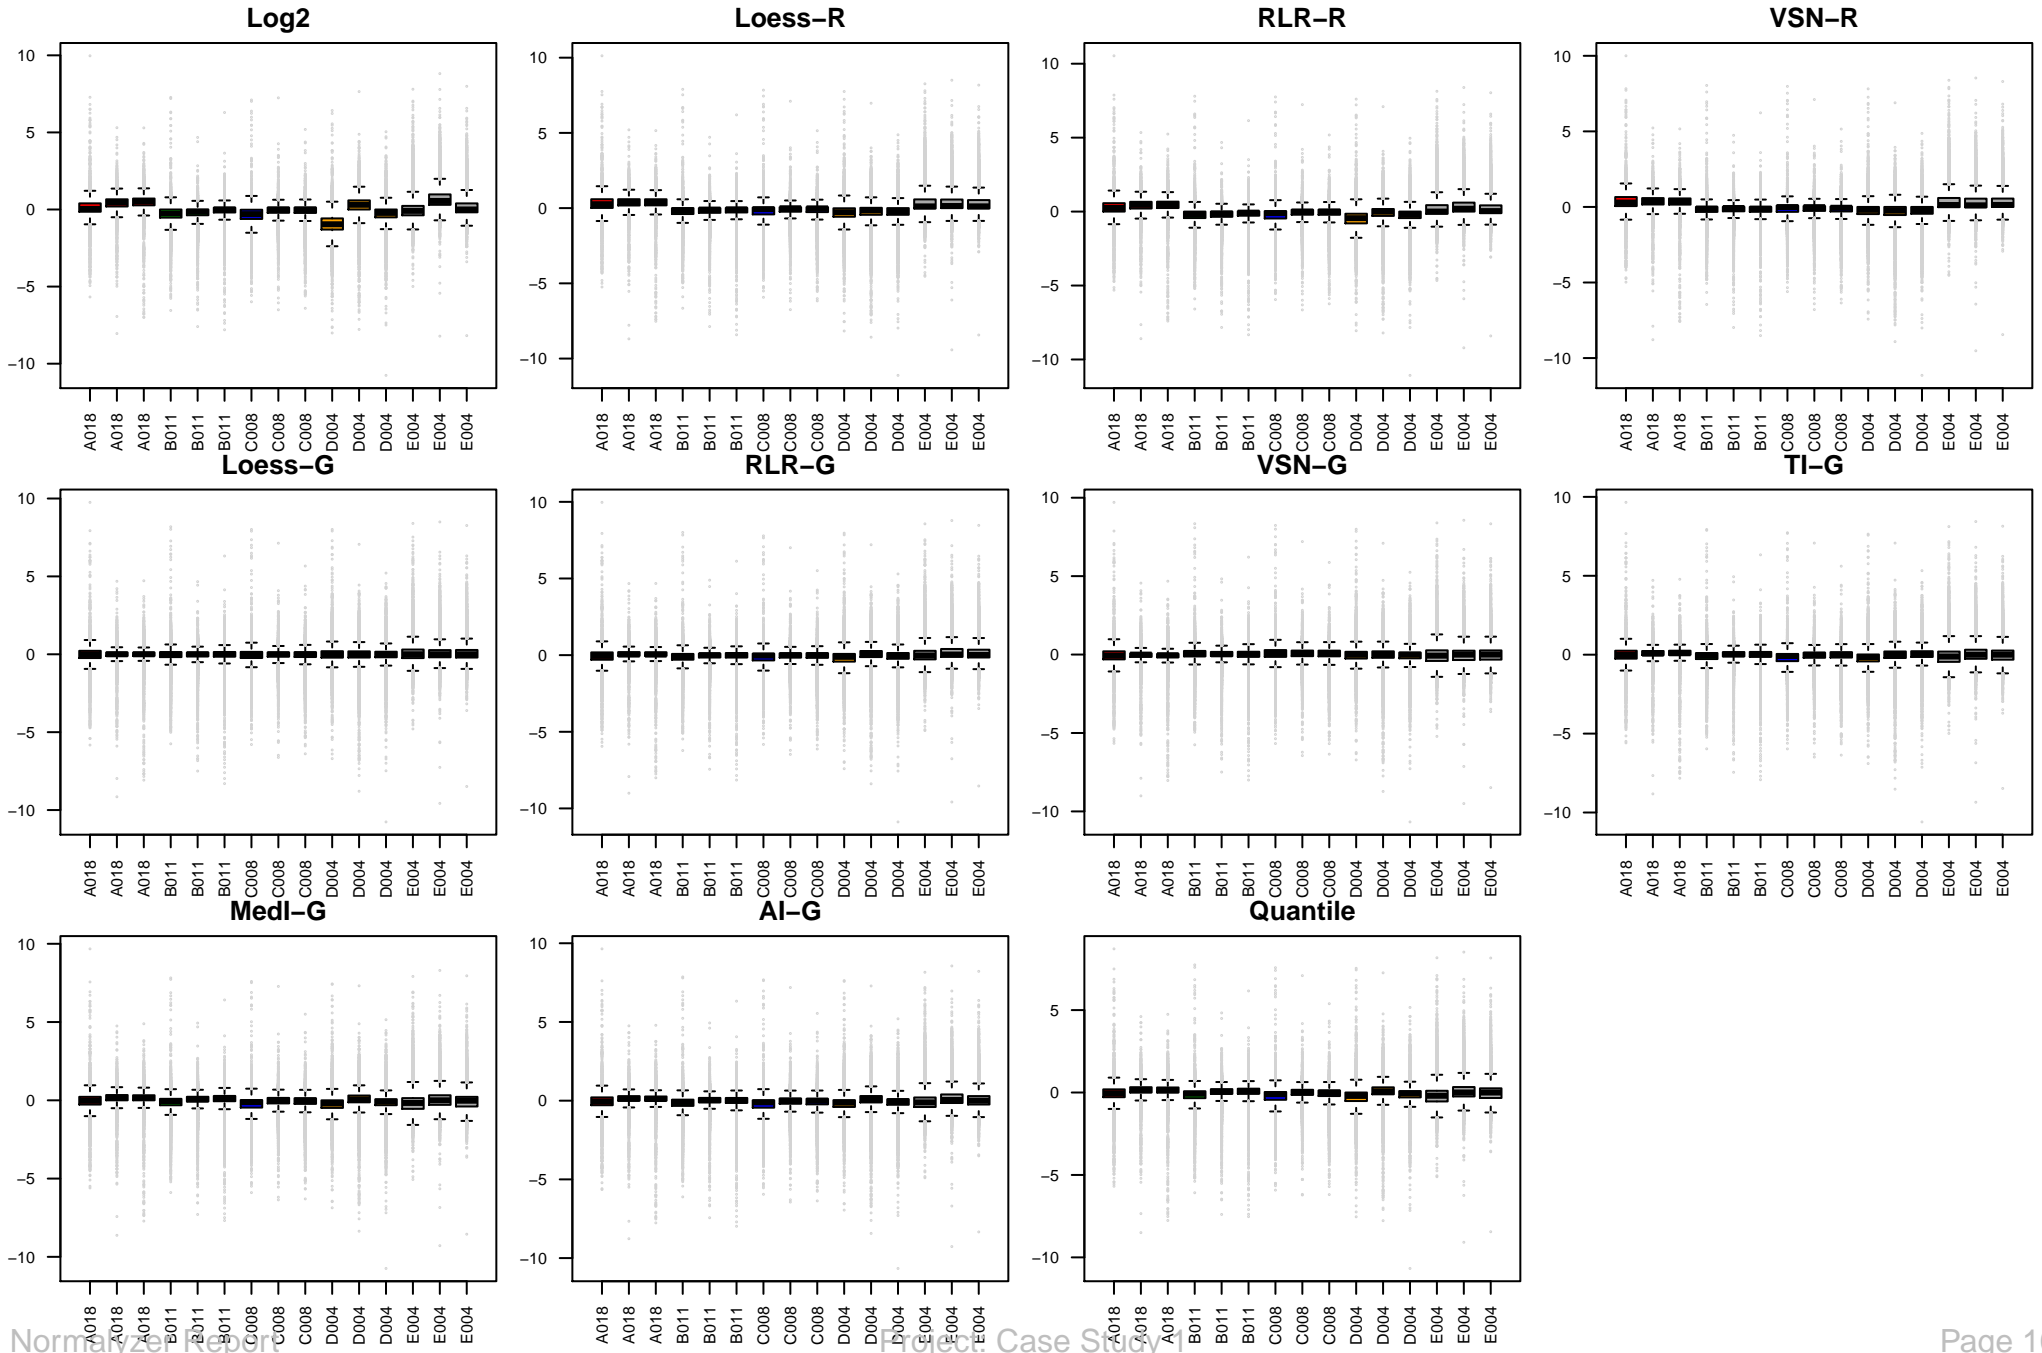

Density plots

**Log2**

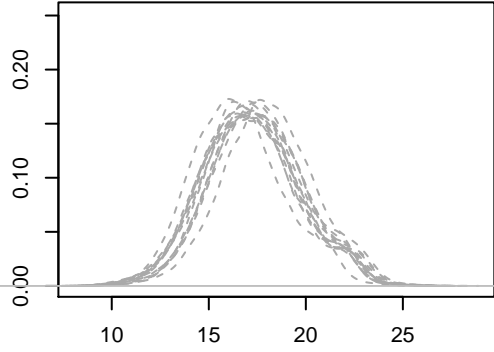

**Loess-R**

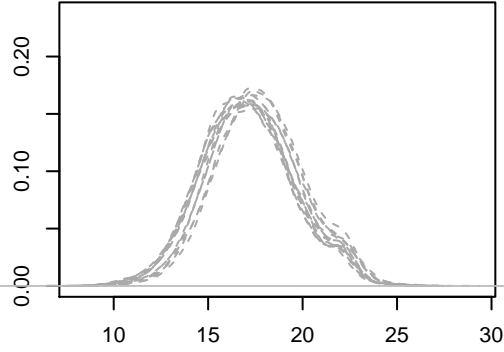

**RLR-R**

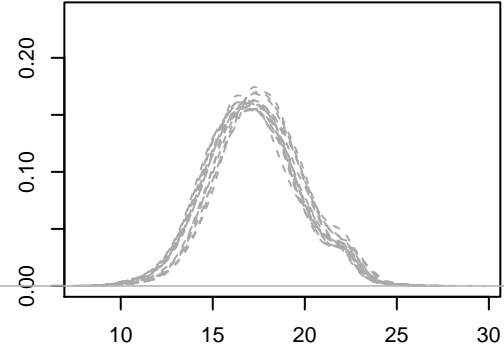

**VSN-R**

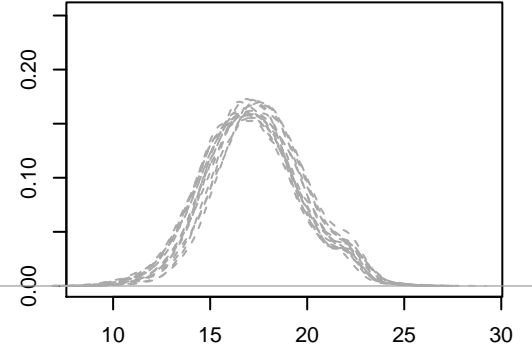

**Loess-G**

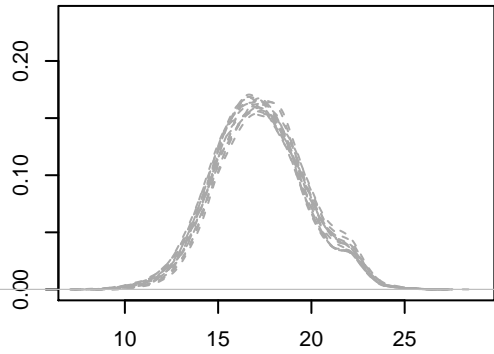

**RLR-G**

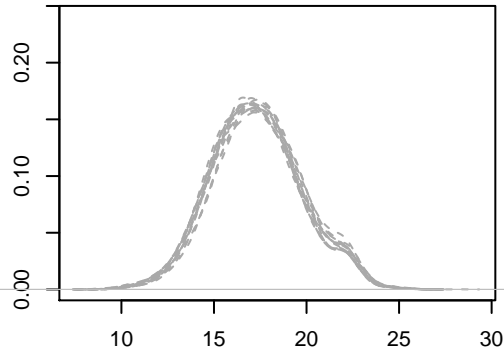

**VSN-G**

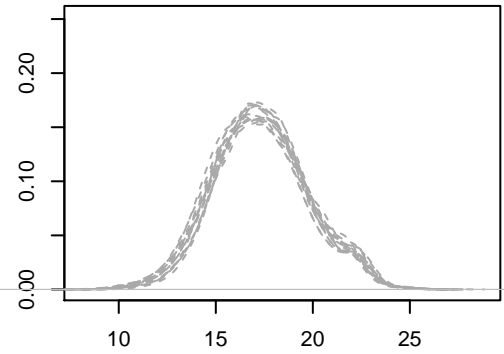

**TI-G**

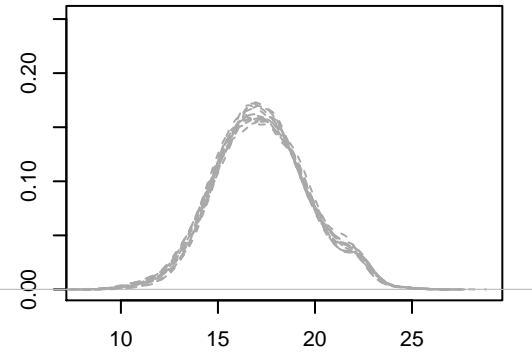

**MedI-G**

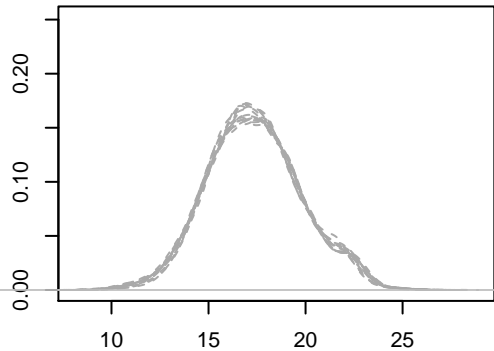

**AI-G**

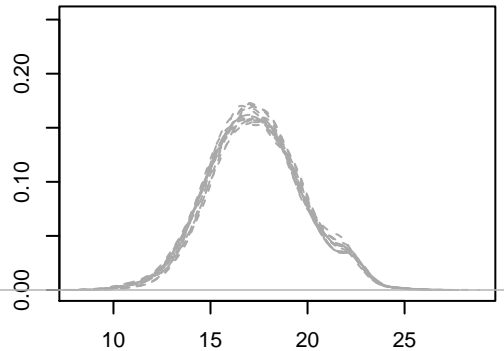

**Quantile**

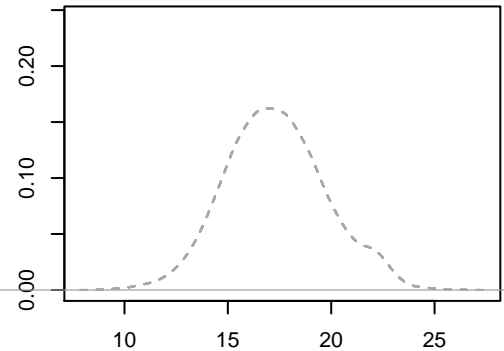

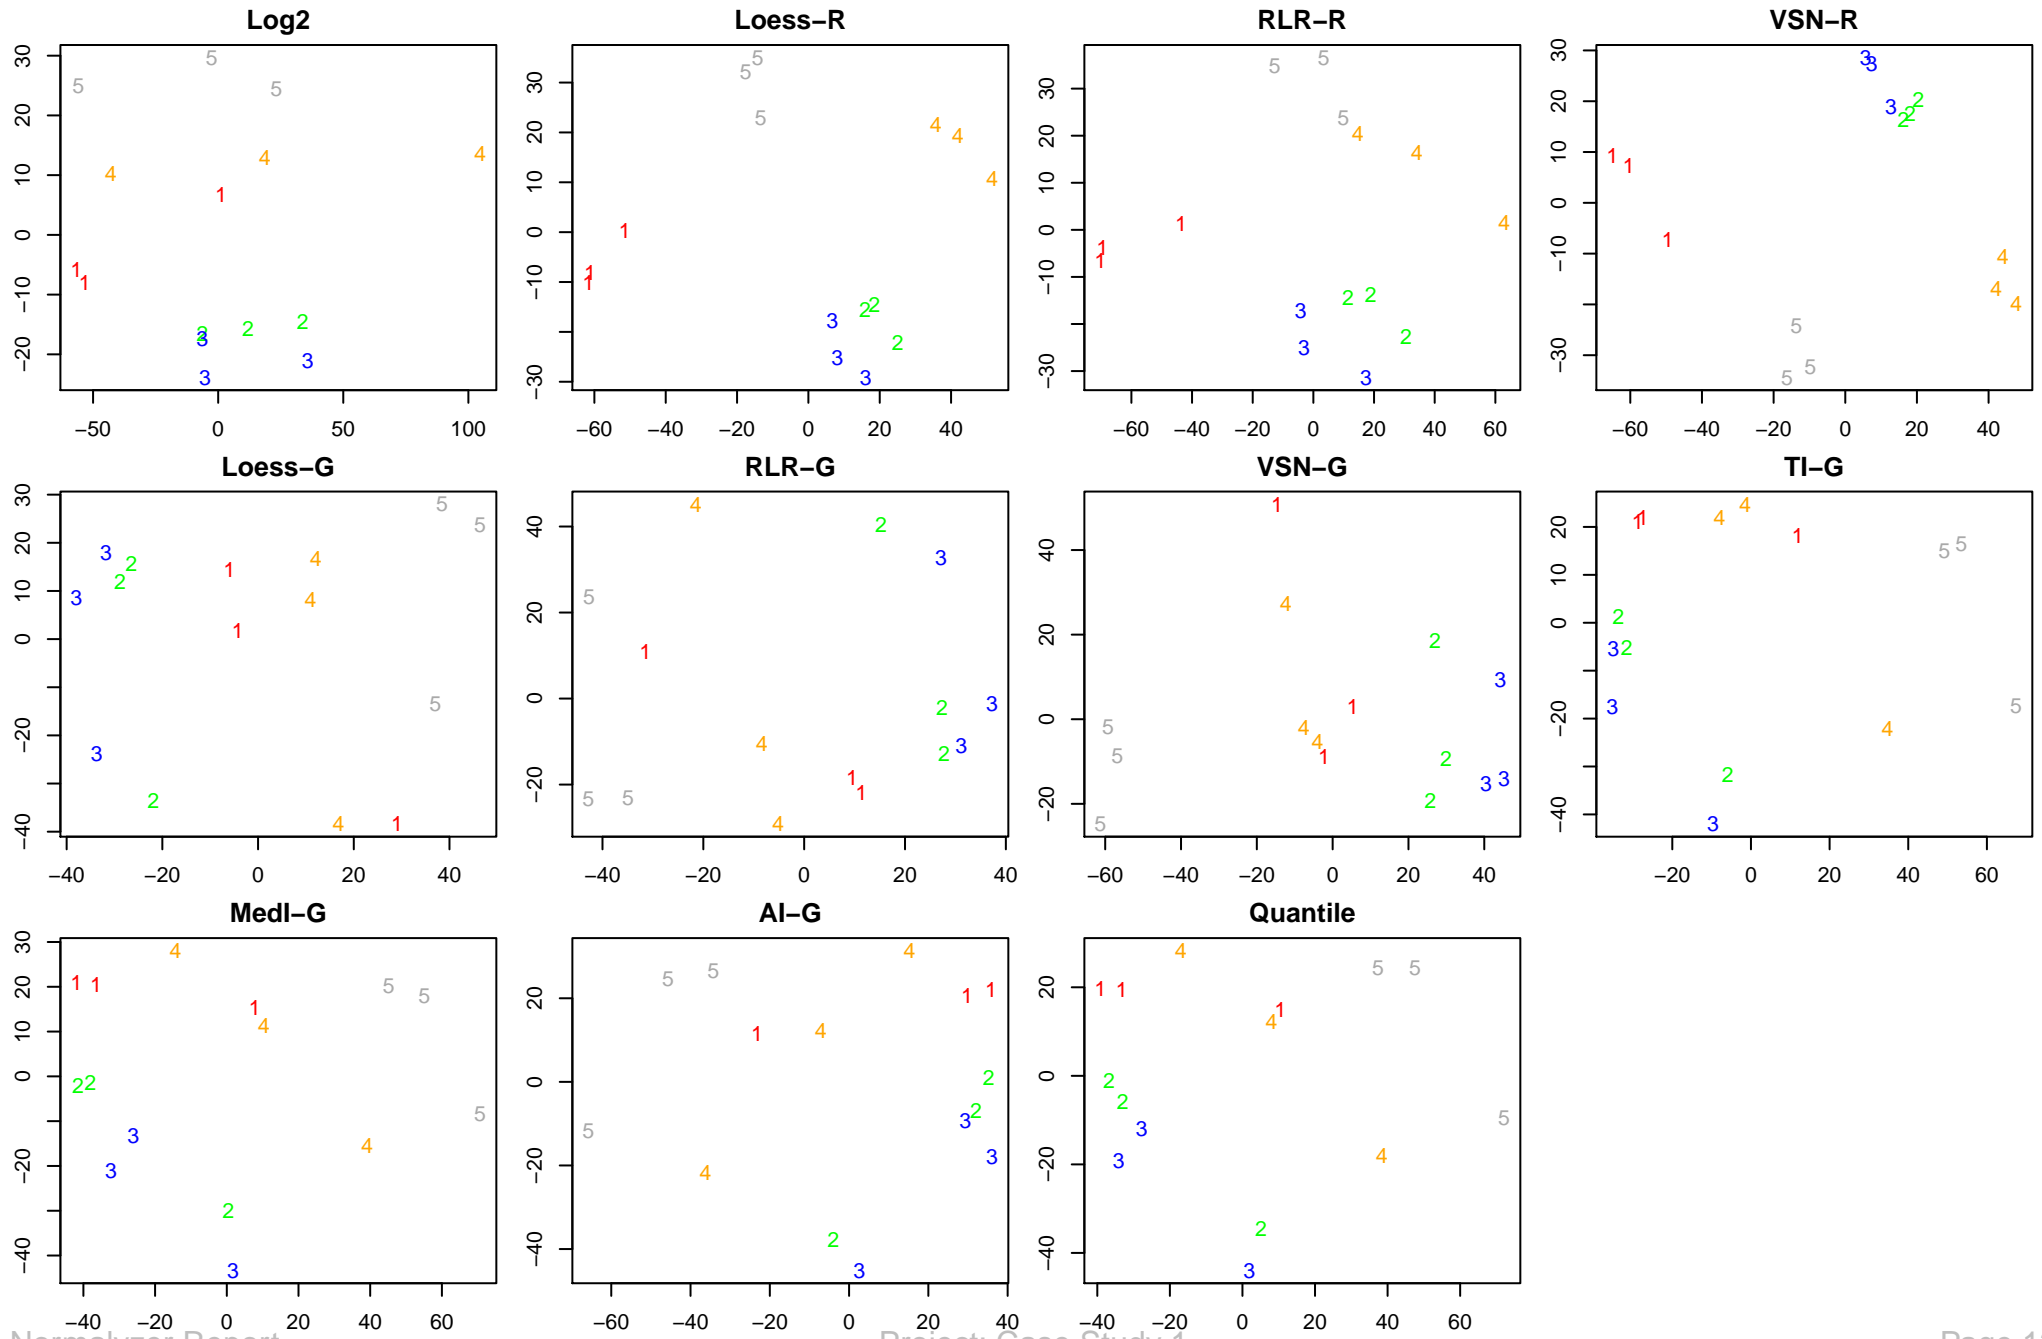

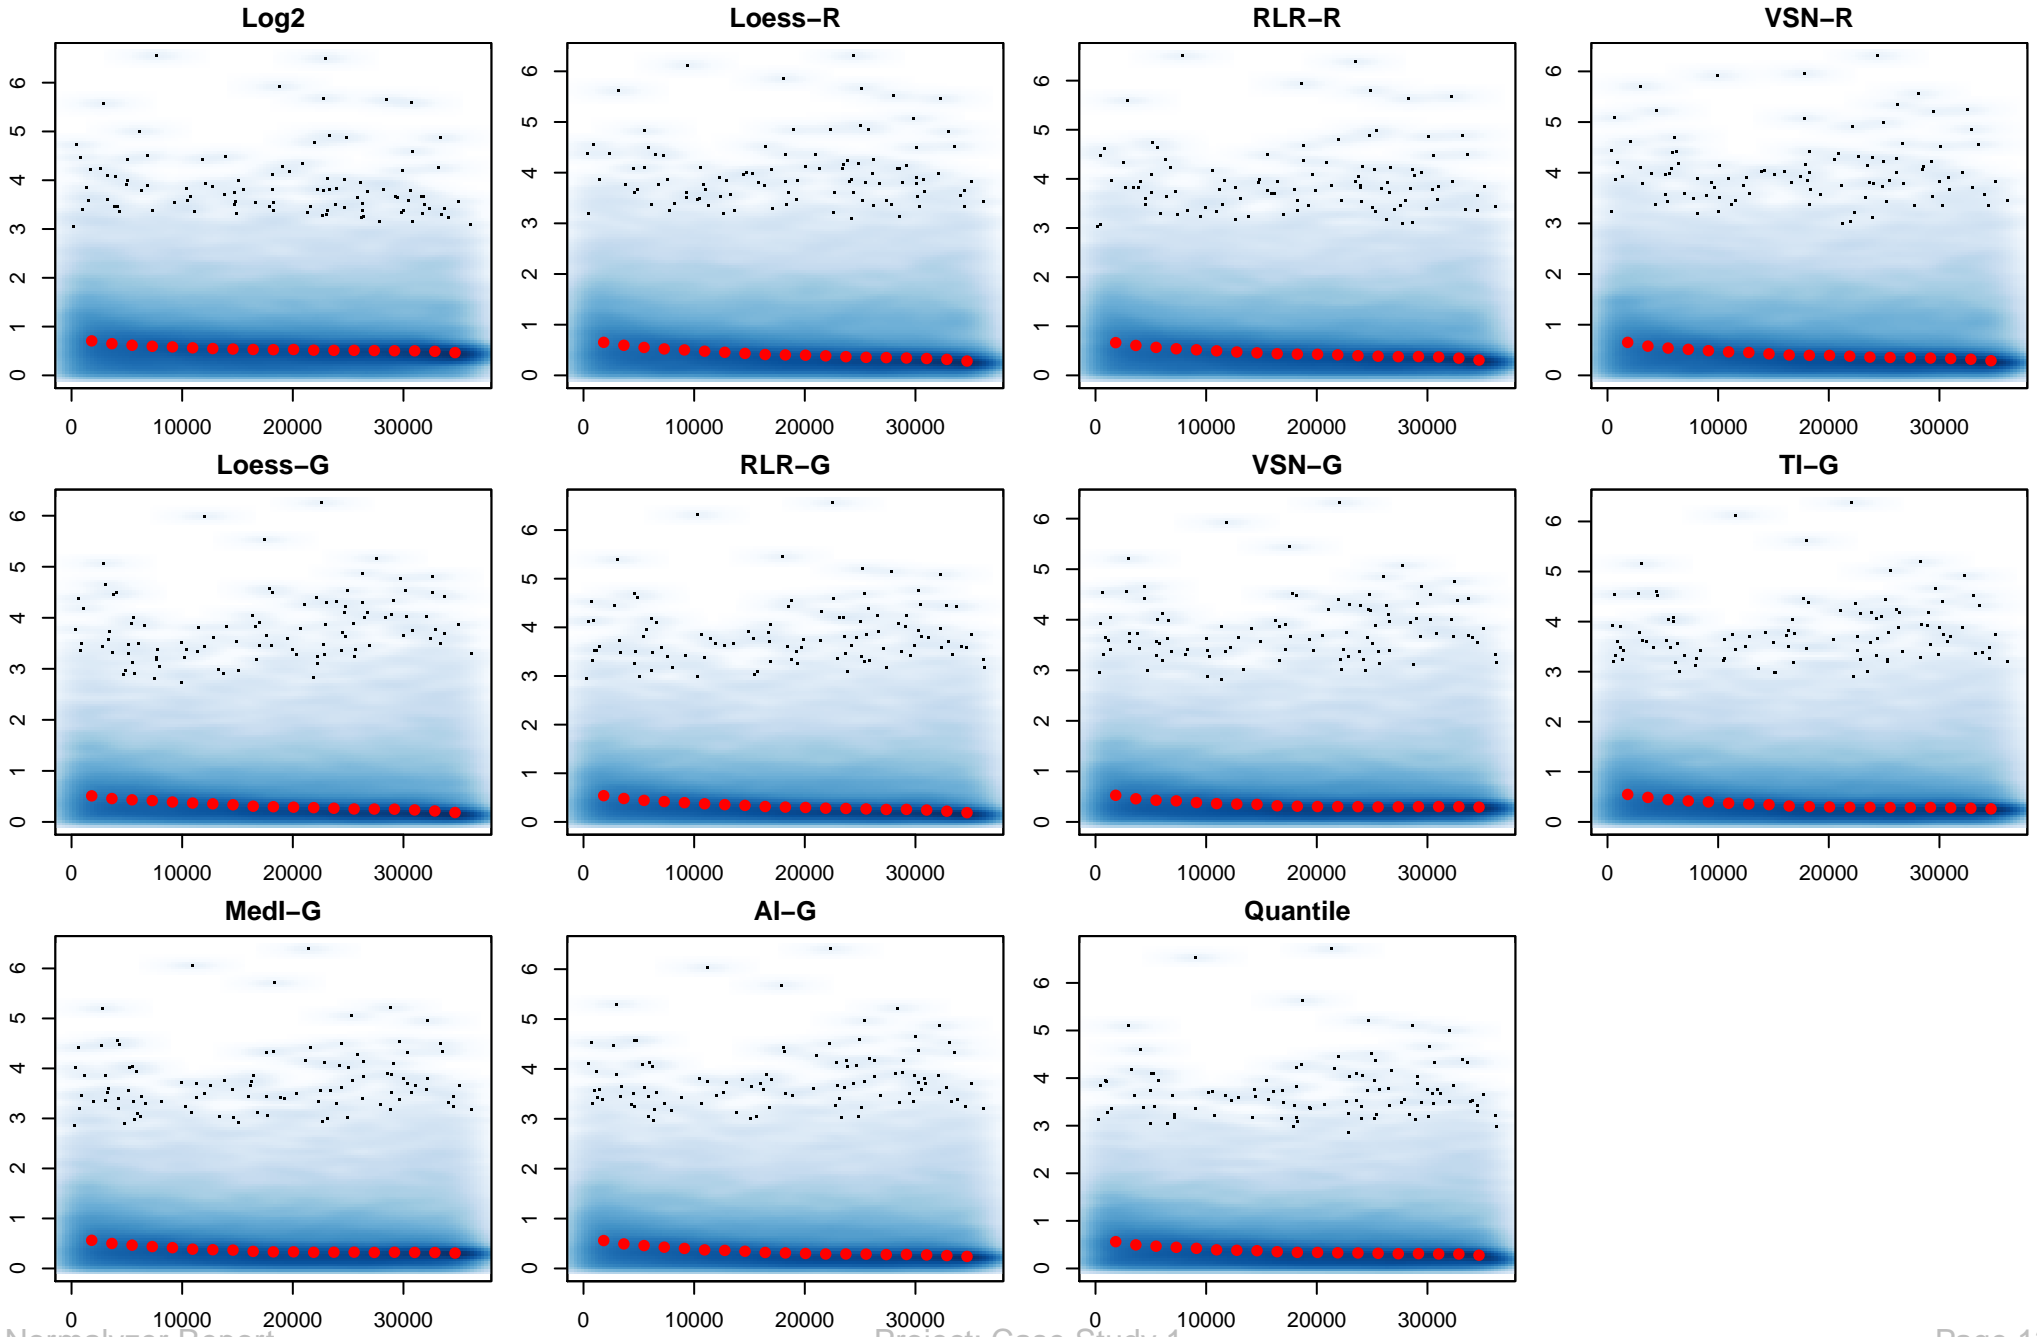

**Pearson correlation – Intragroup**

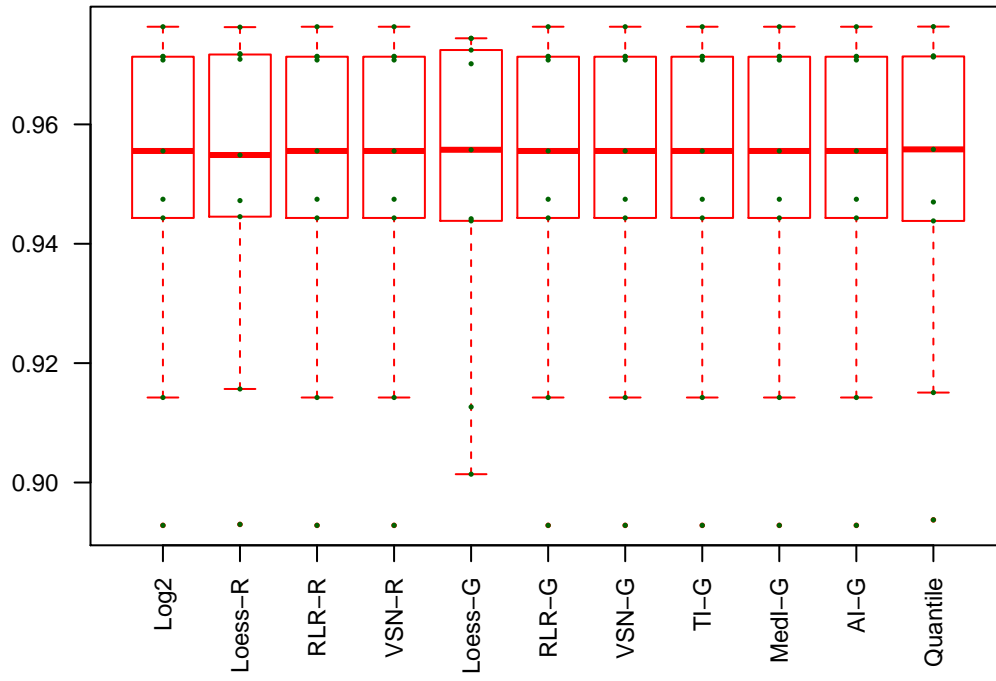

**Spearman correlation – Intragroup**

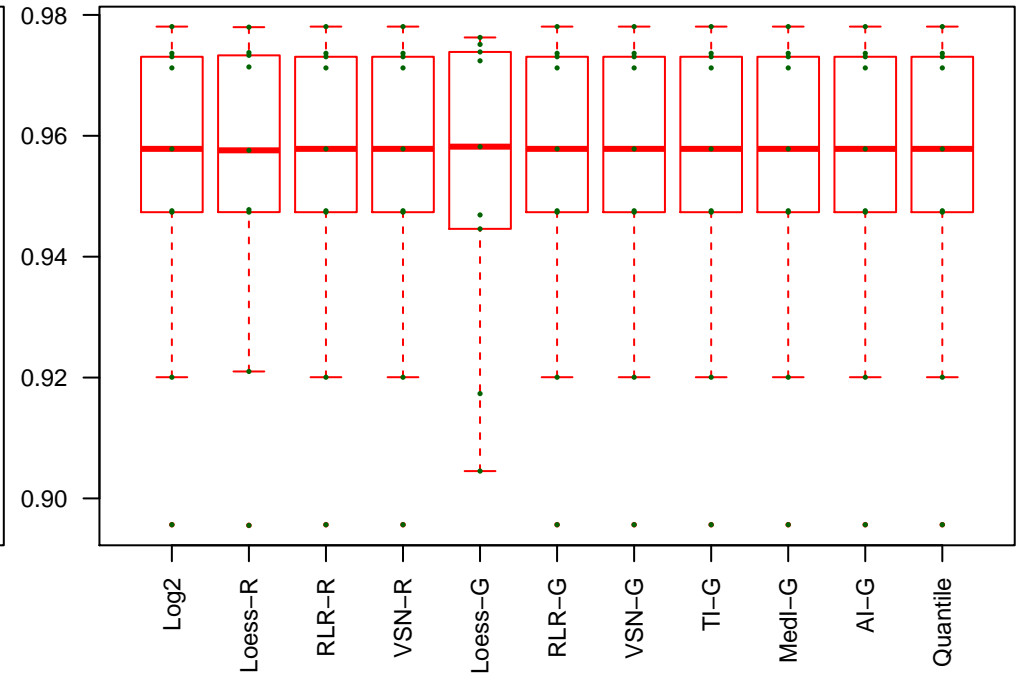

Dendrograms – Built from 2472 variables containing non-missing data

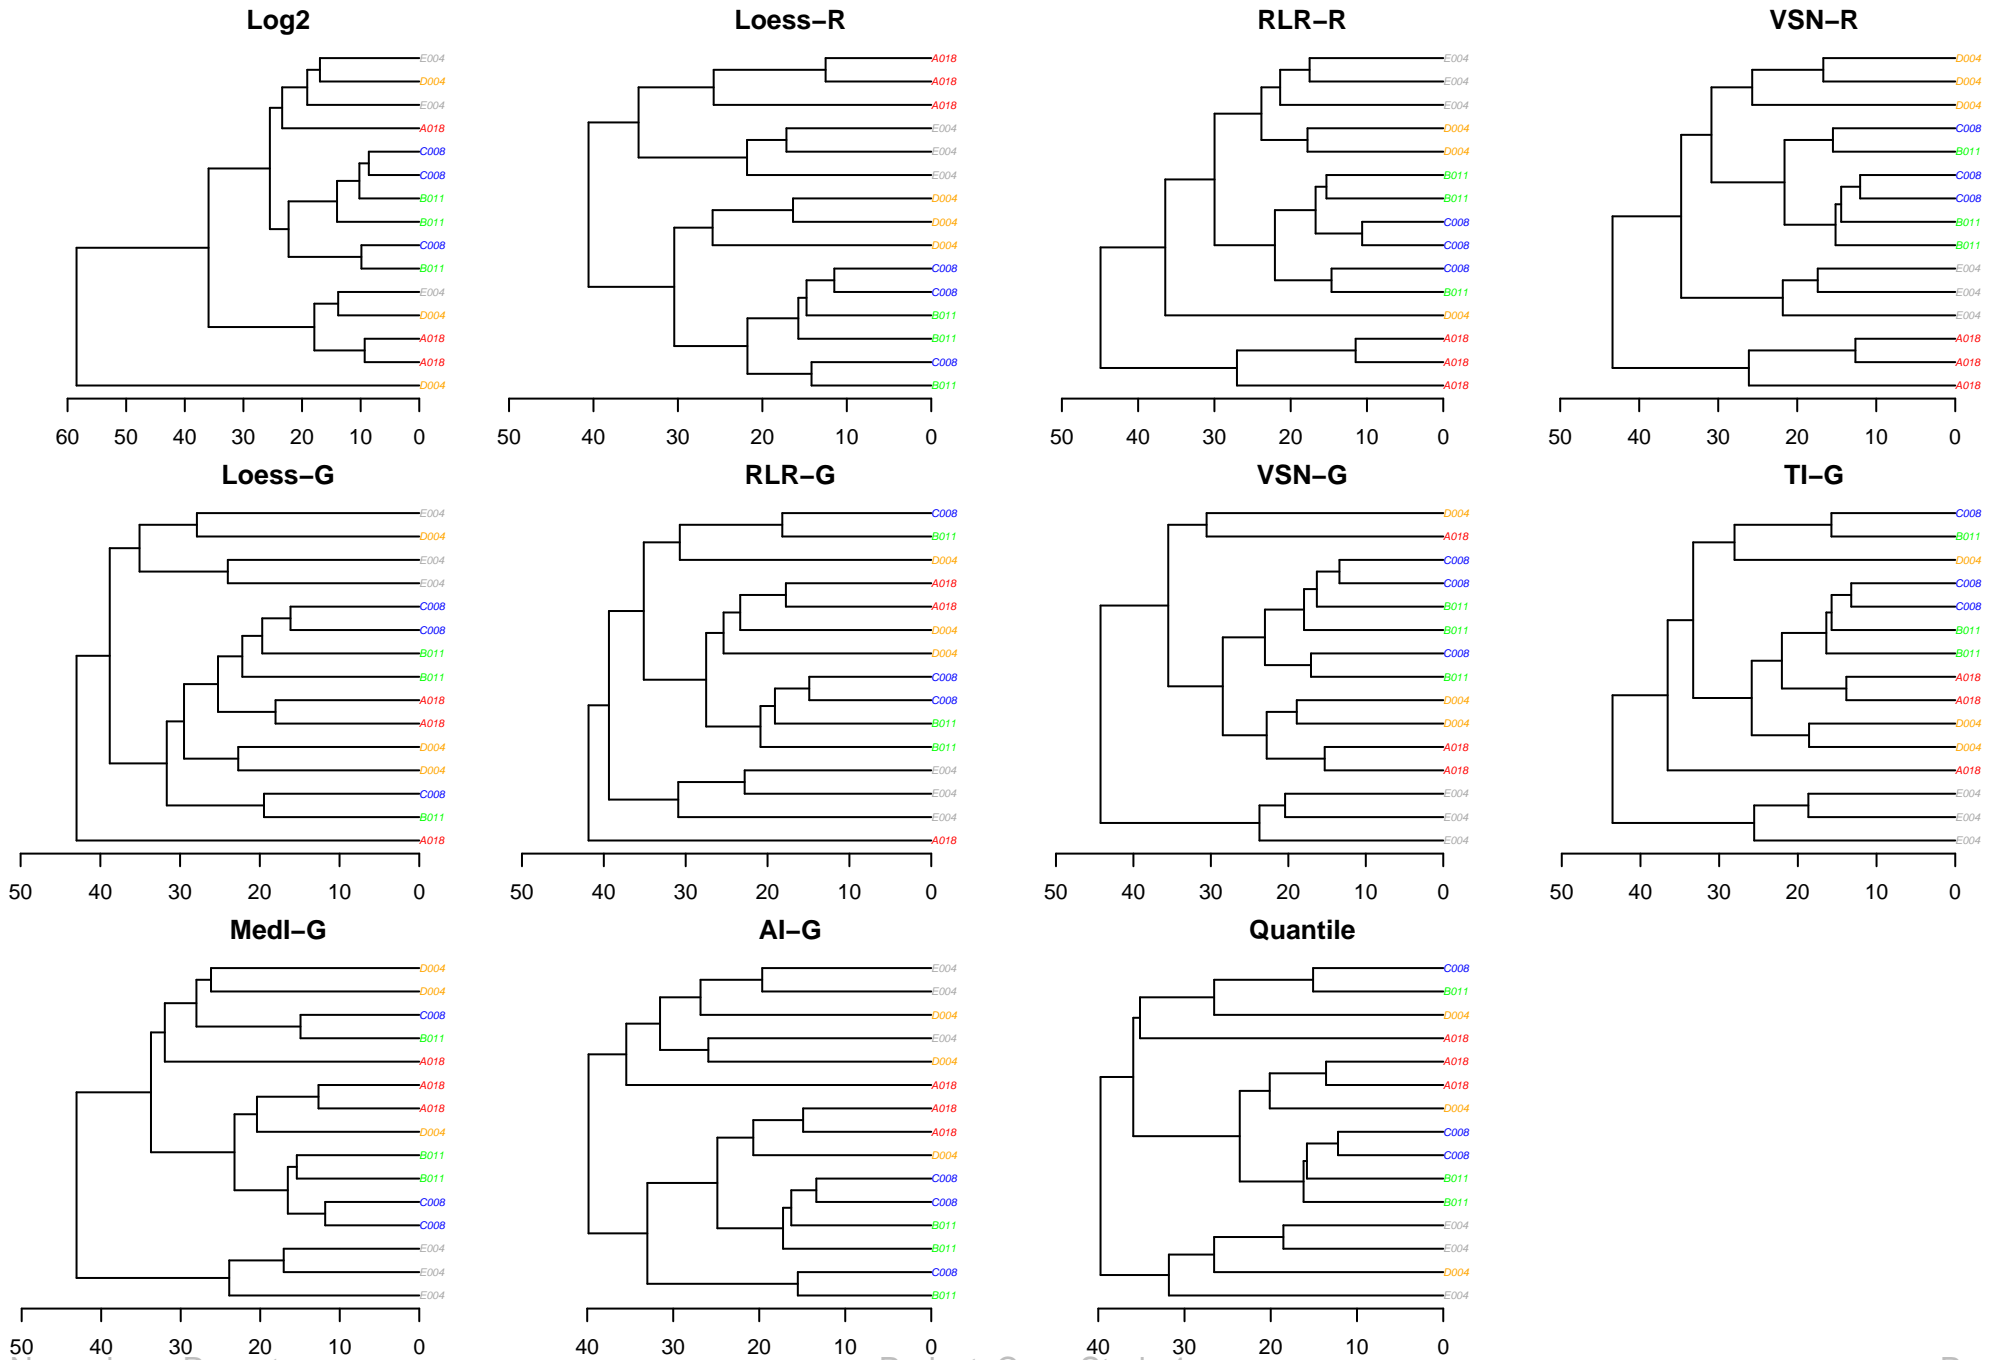

Differential Expression

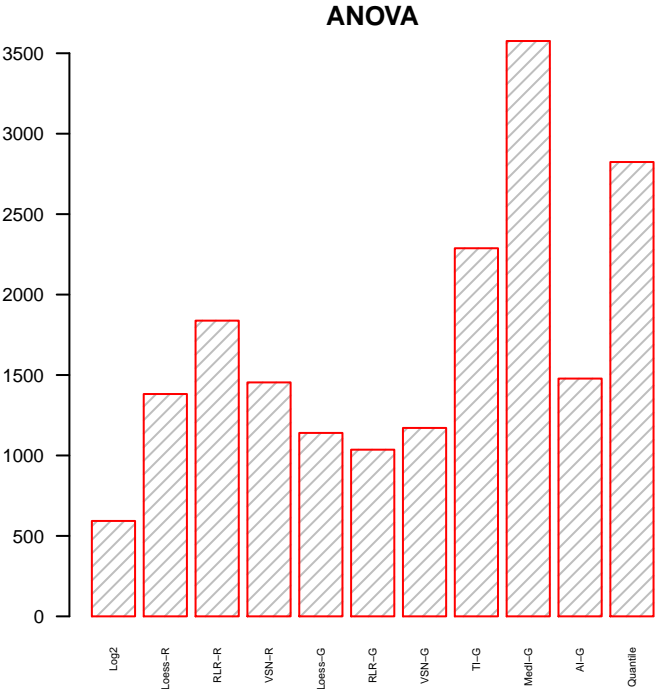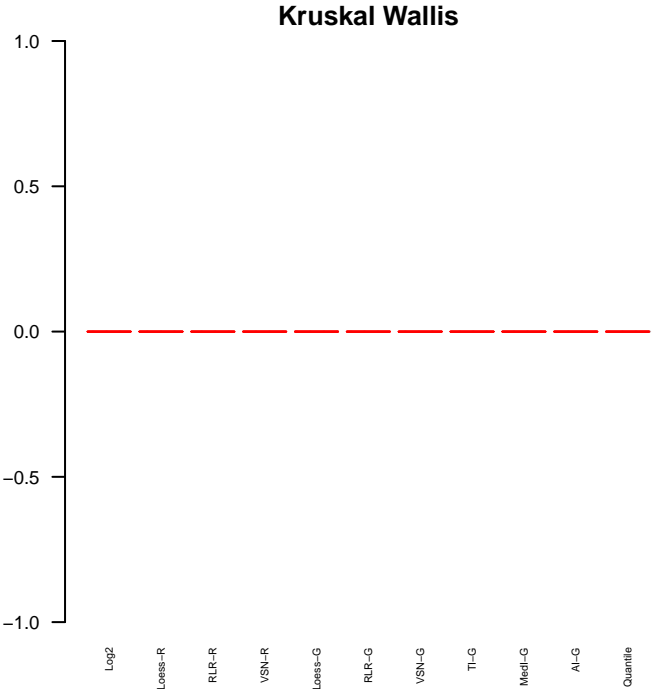

Supplement: pr401264n_si_001.pdf [file pr401264n_si_001.pdf]
