# Supplementary material
Source: PubMed Central journal article supplement (PMC4053077)

Project Name: Case Study 3

Normalization report by Normalyzer

Report created on: 2014-03-06

**Total intensity**

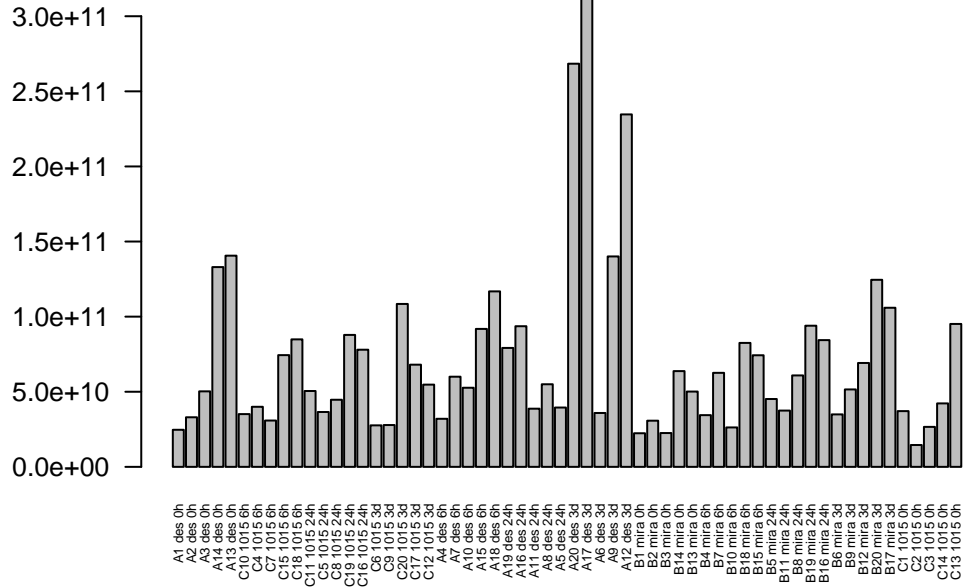

**Total missing**

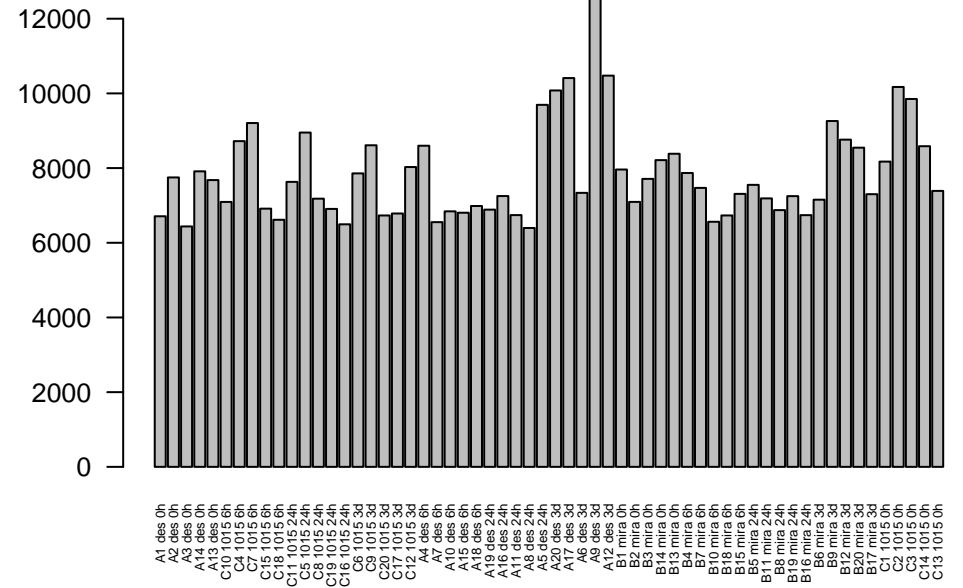

**Log2-MDS plot**

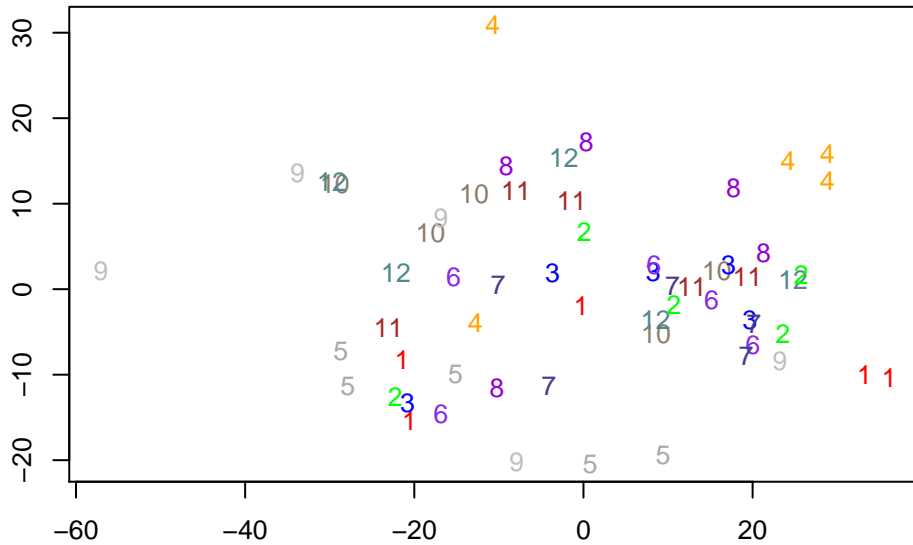

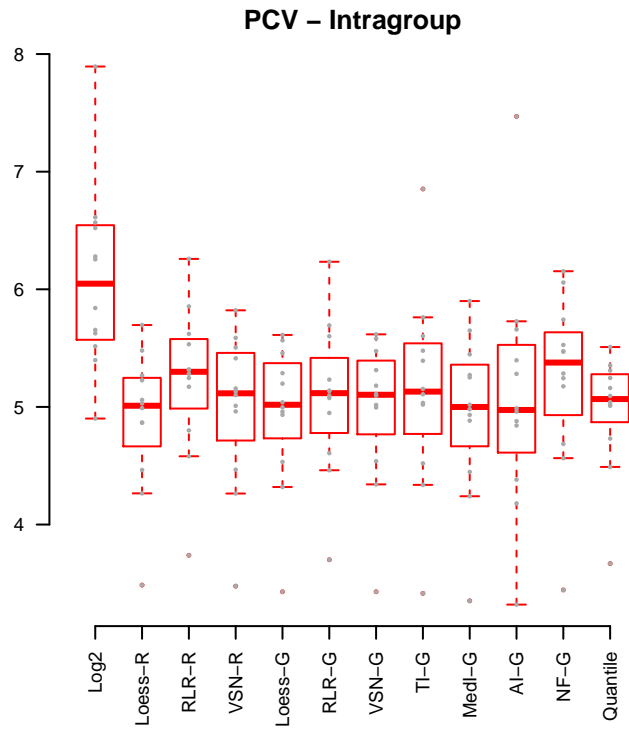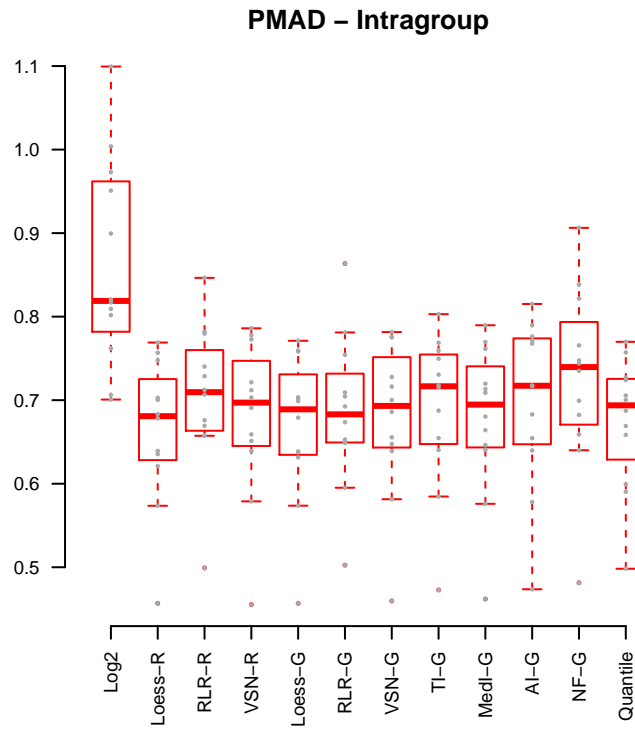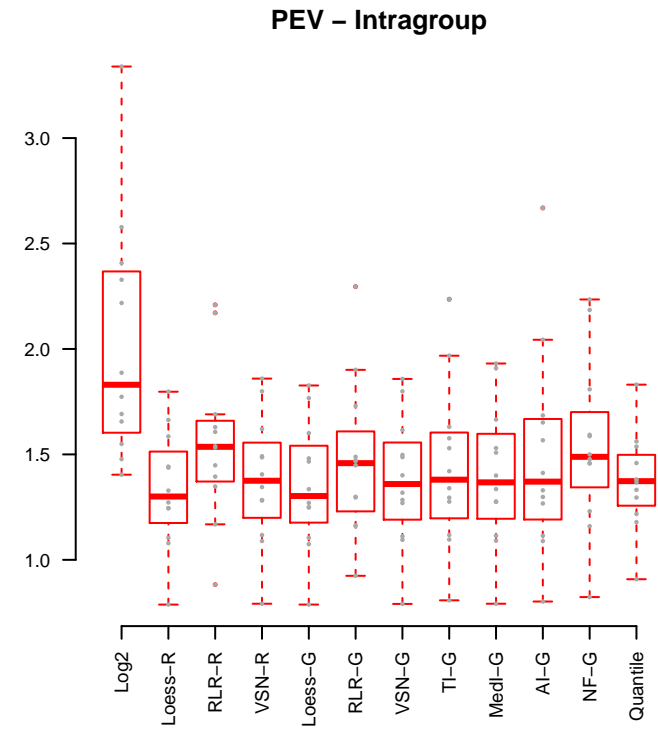

**PCV compared to log2**

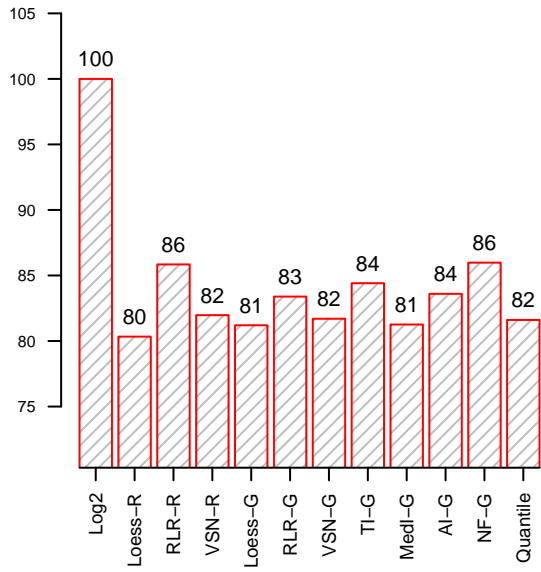

**PMAD compared to log2**

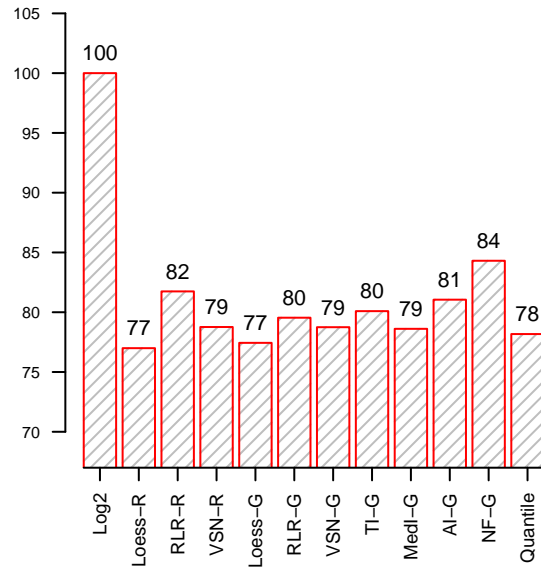

**%PEV – compared to log2**

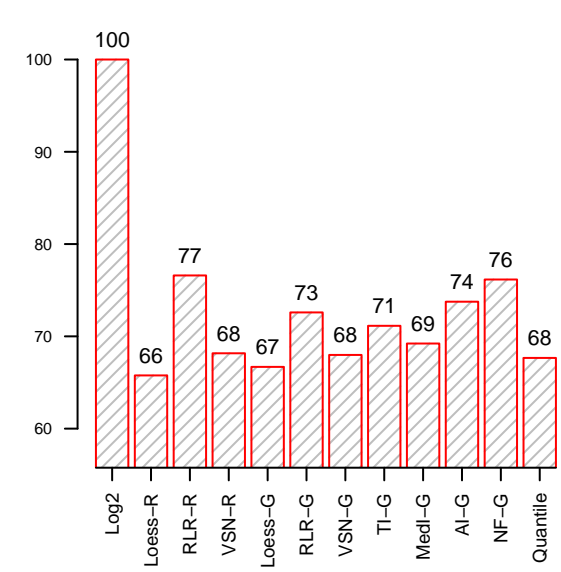

**Stable variables plot**

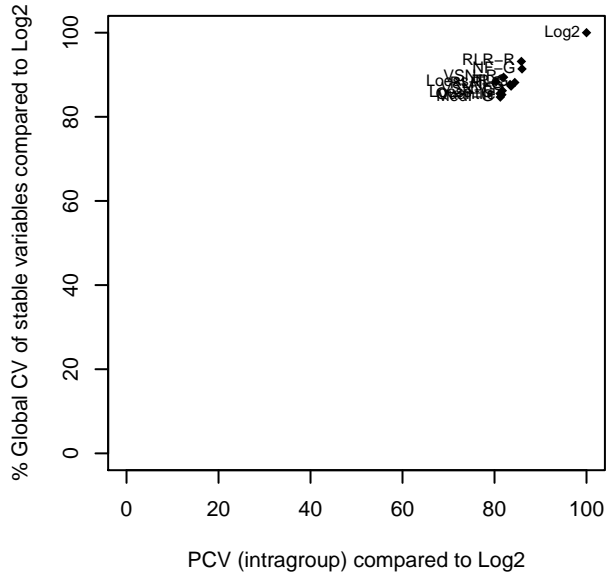

CV vs Raw Intensity plots

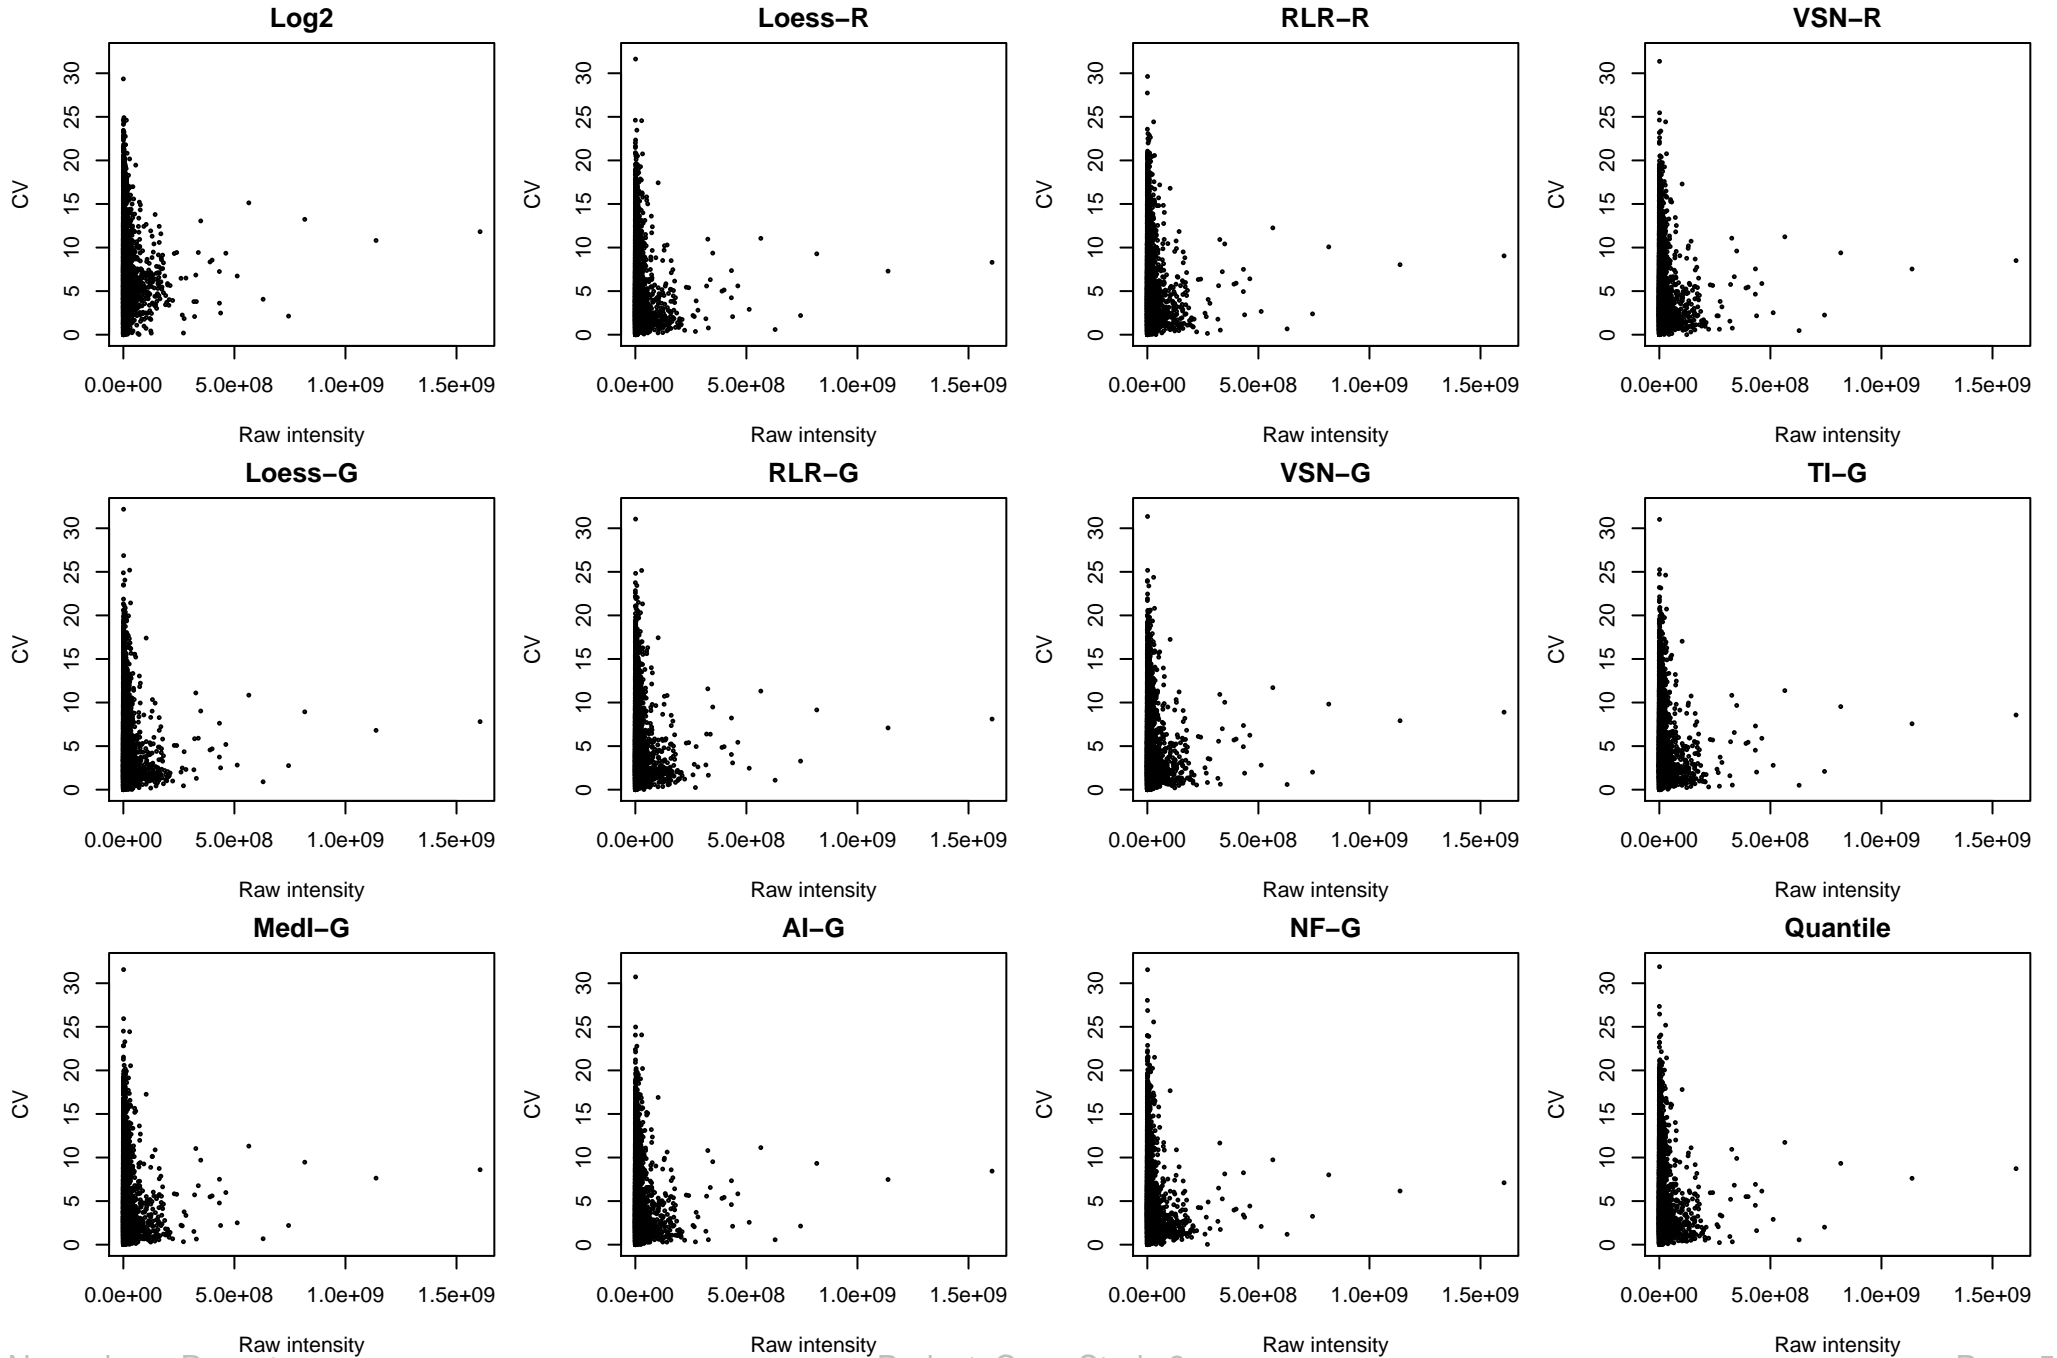

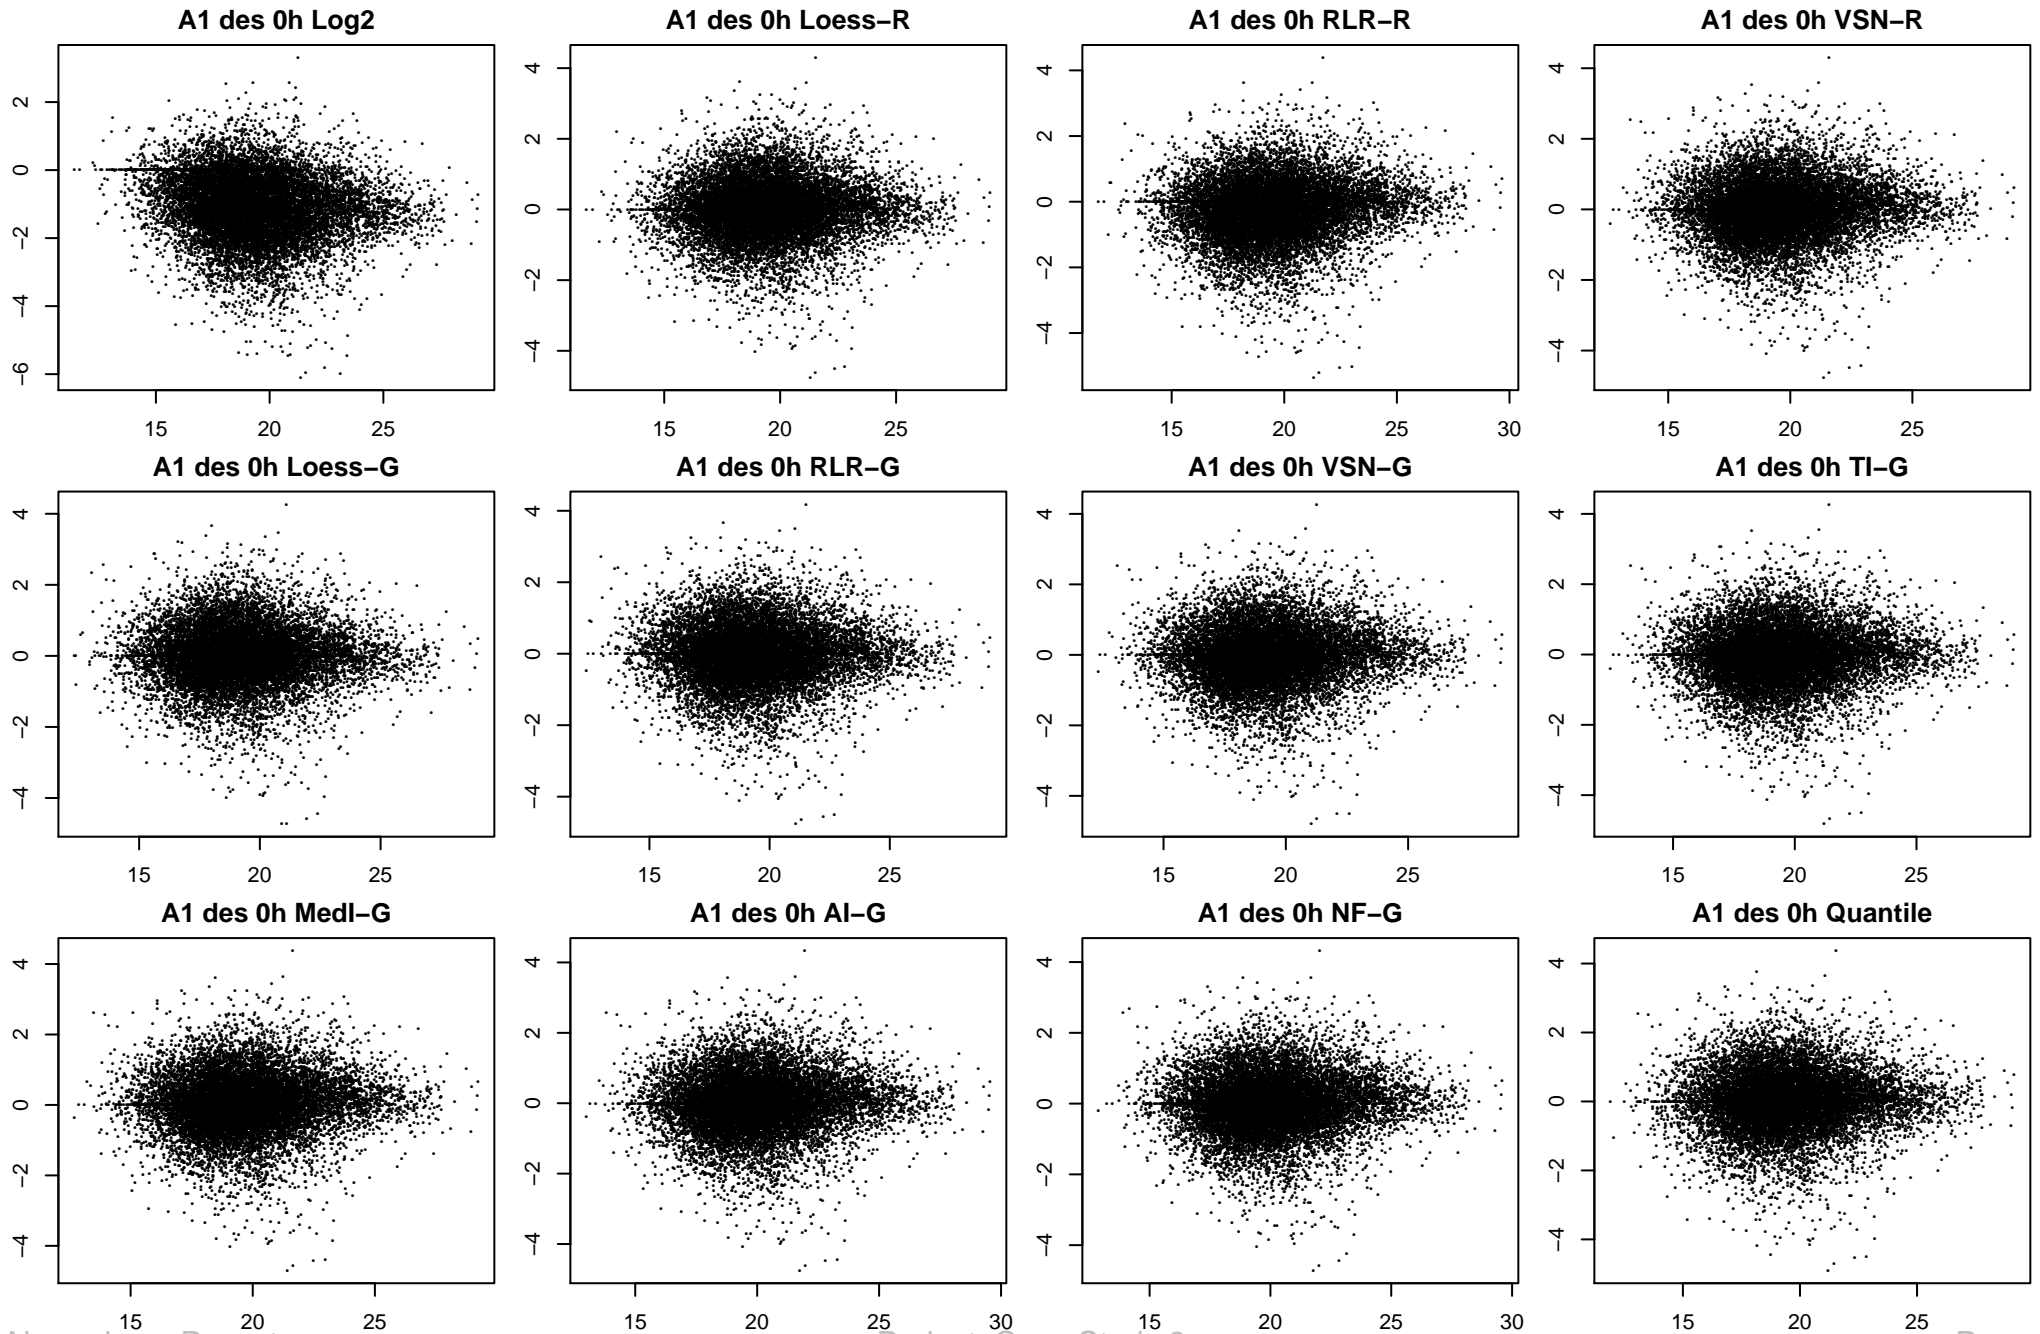

Scatterplots of the first two samples in the data

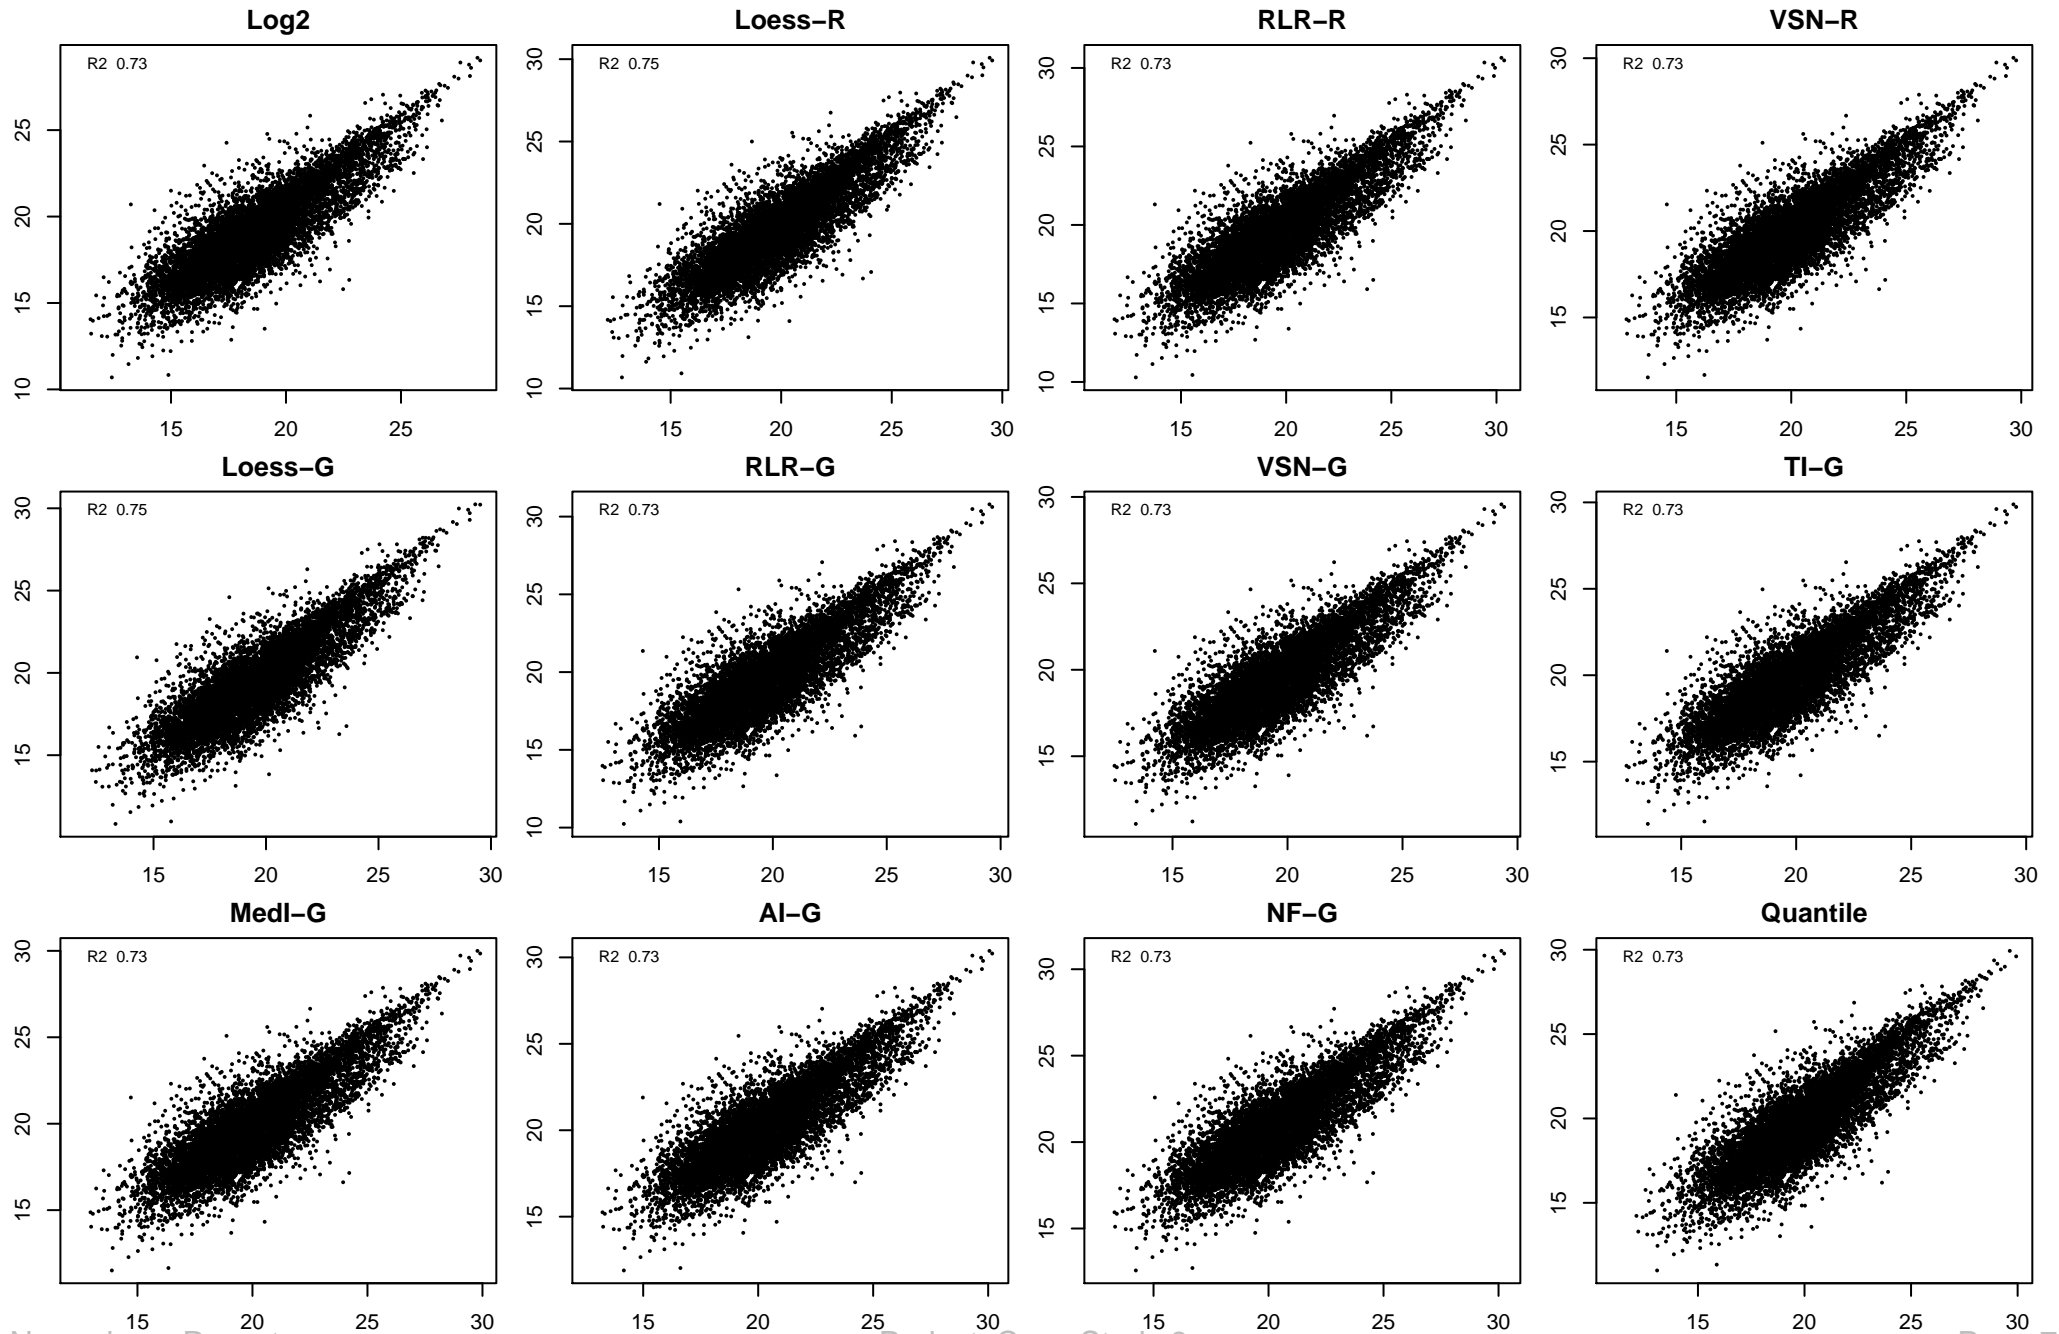

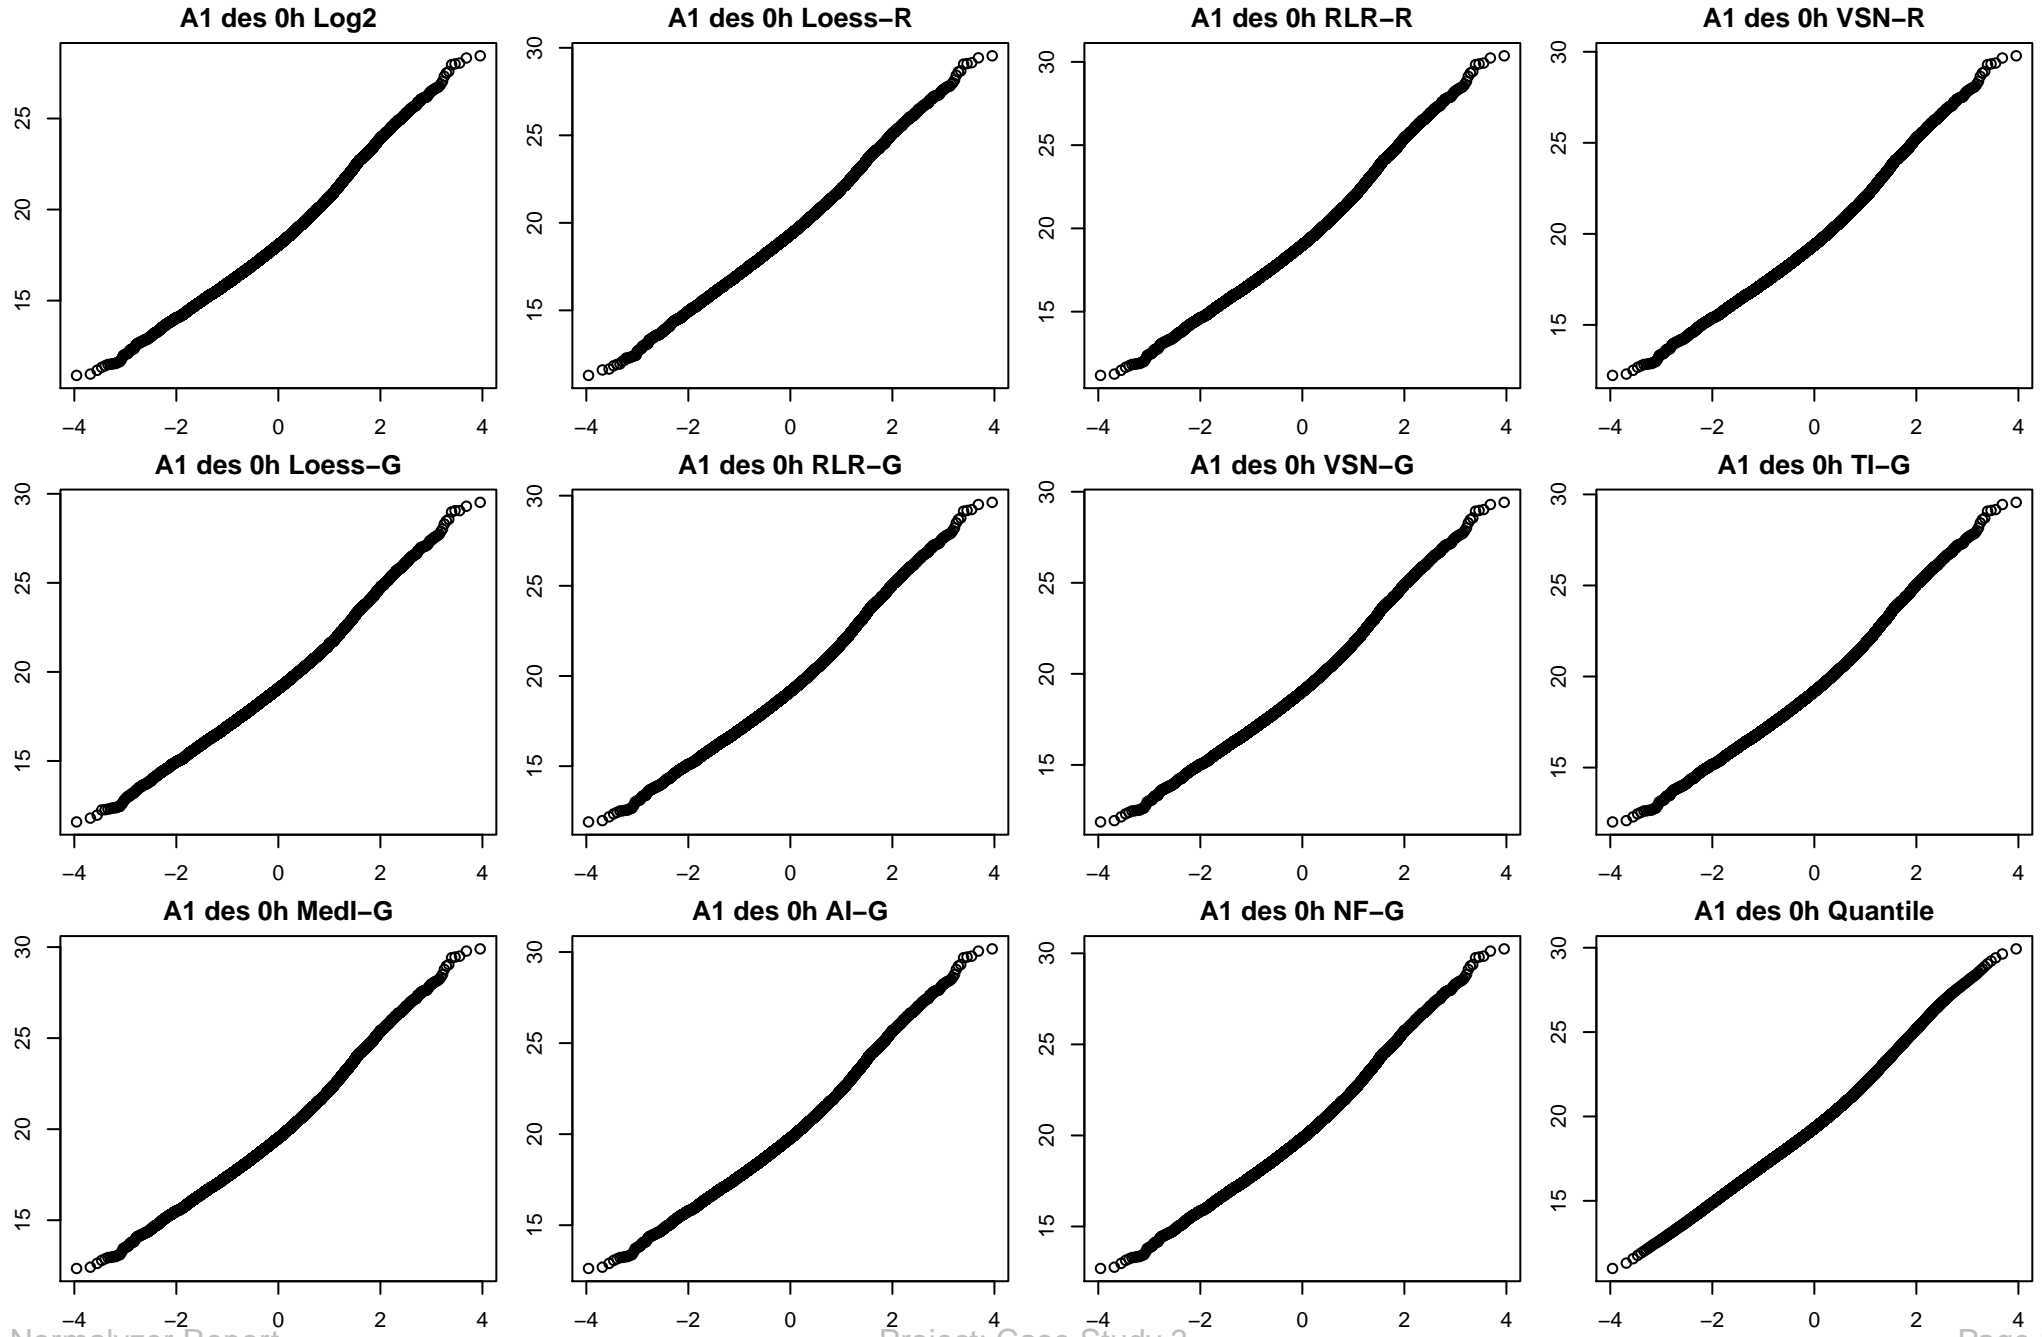



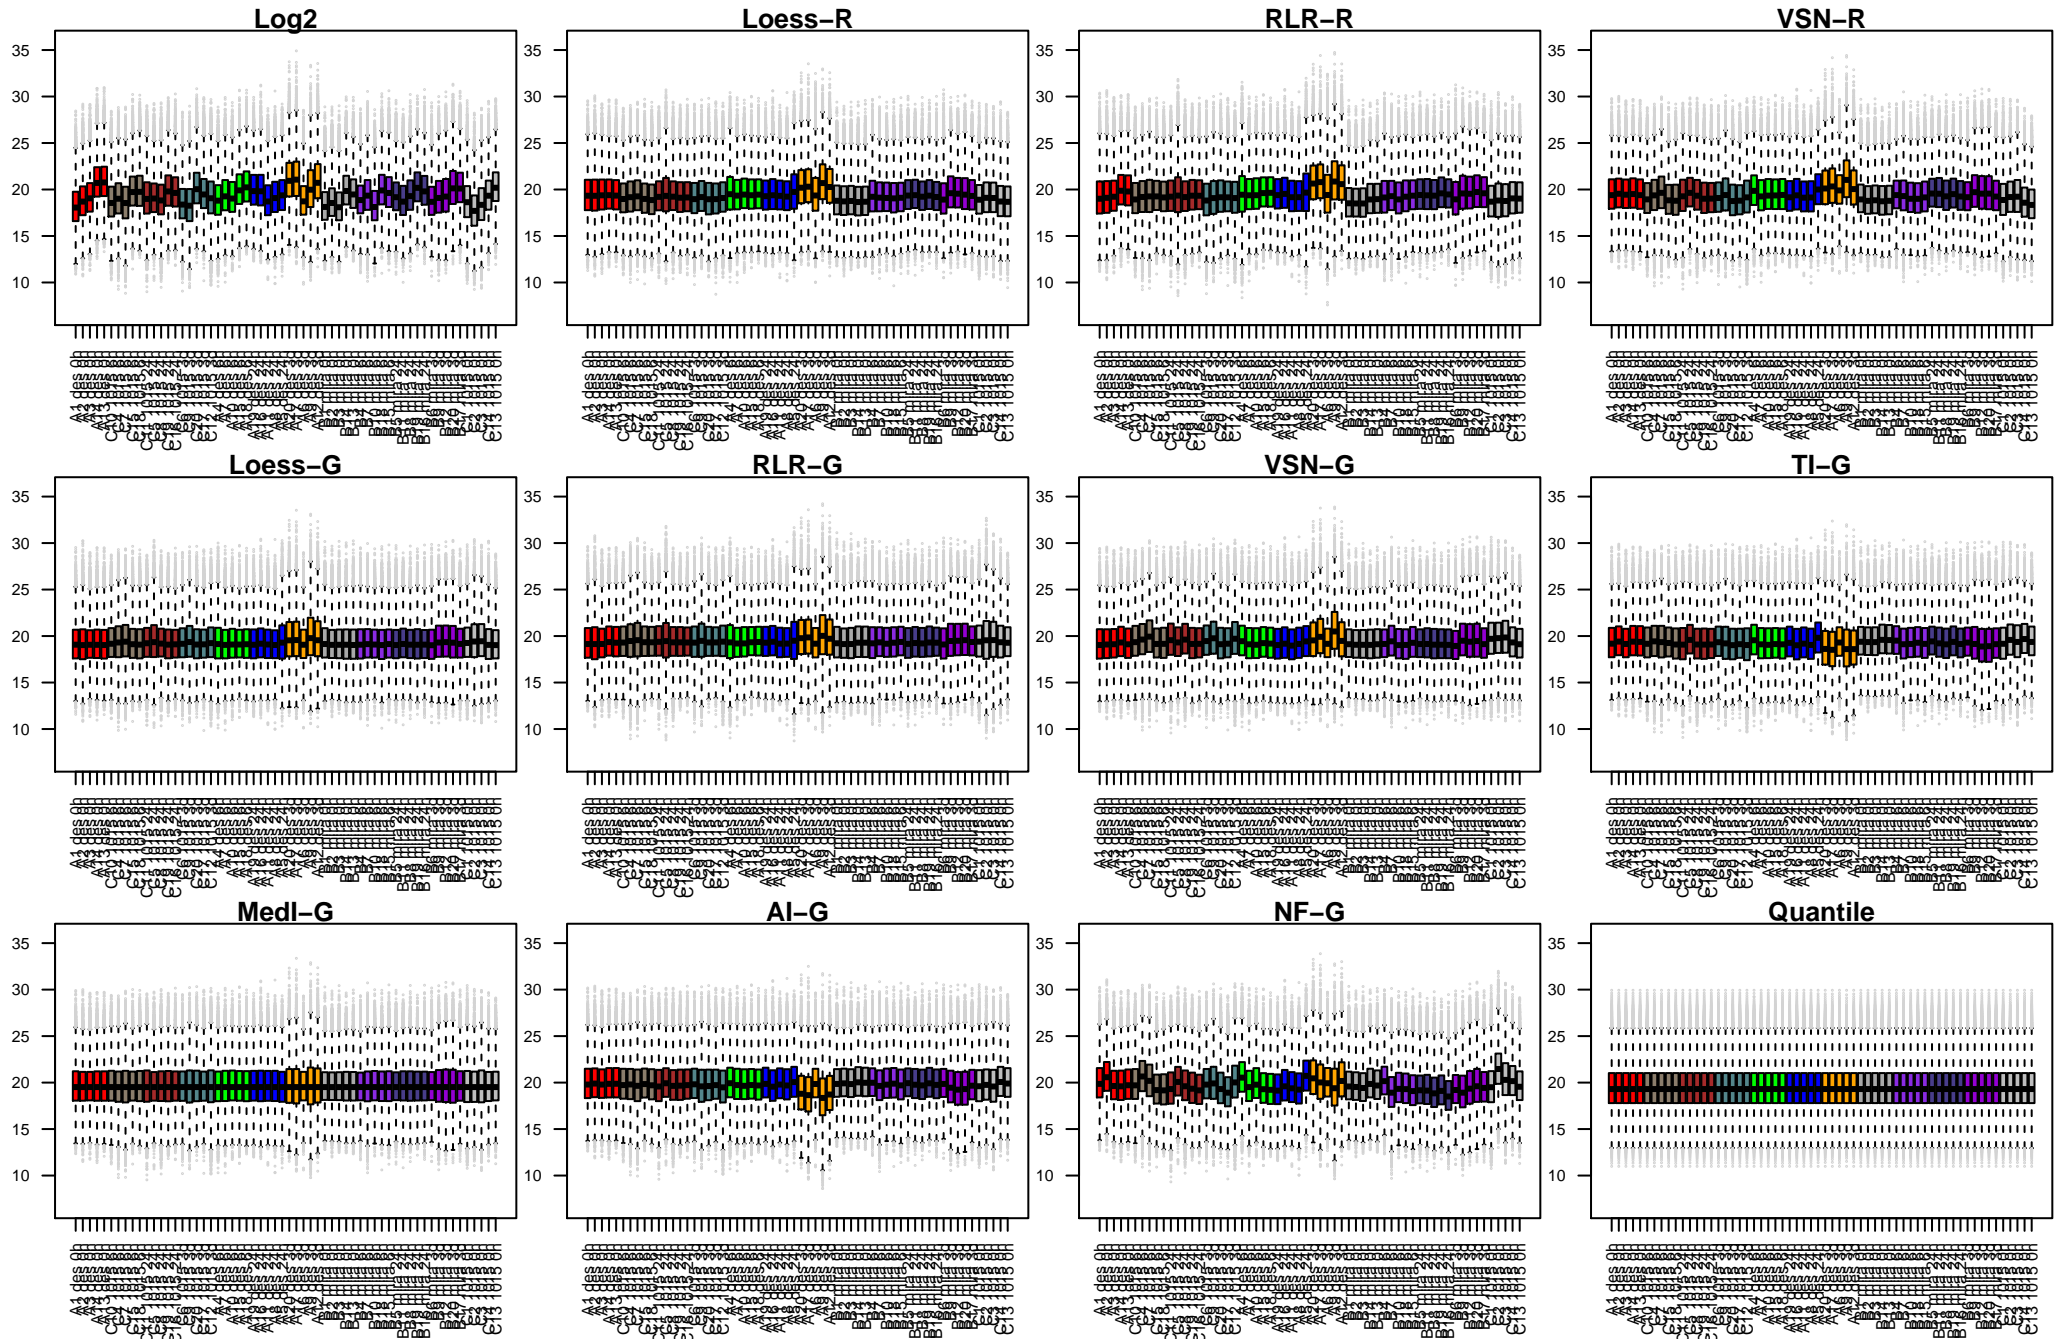

Relative Log Expression (RLE) plots

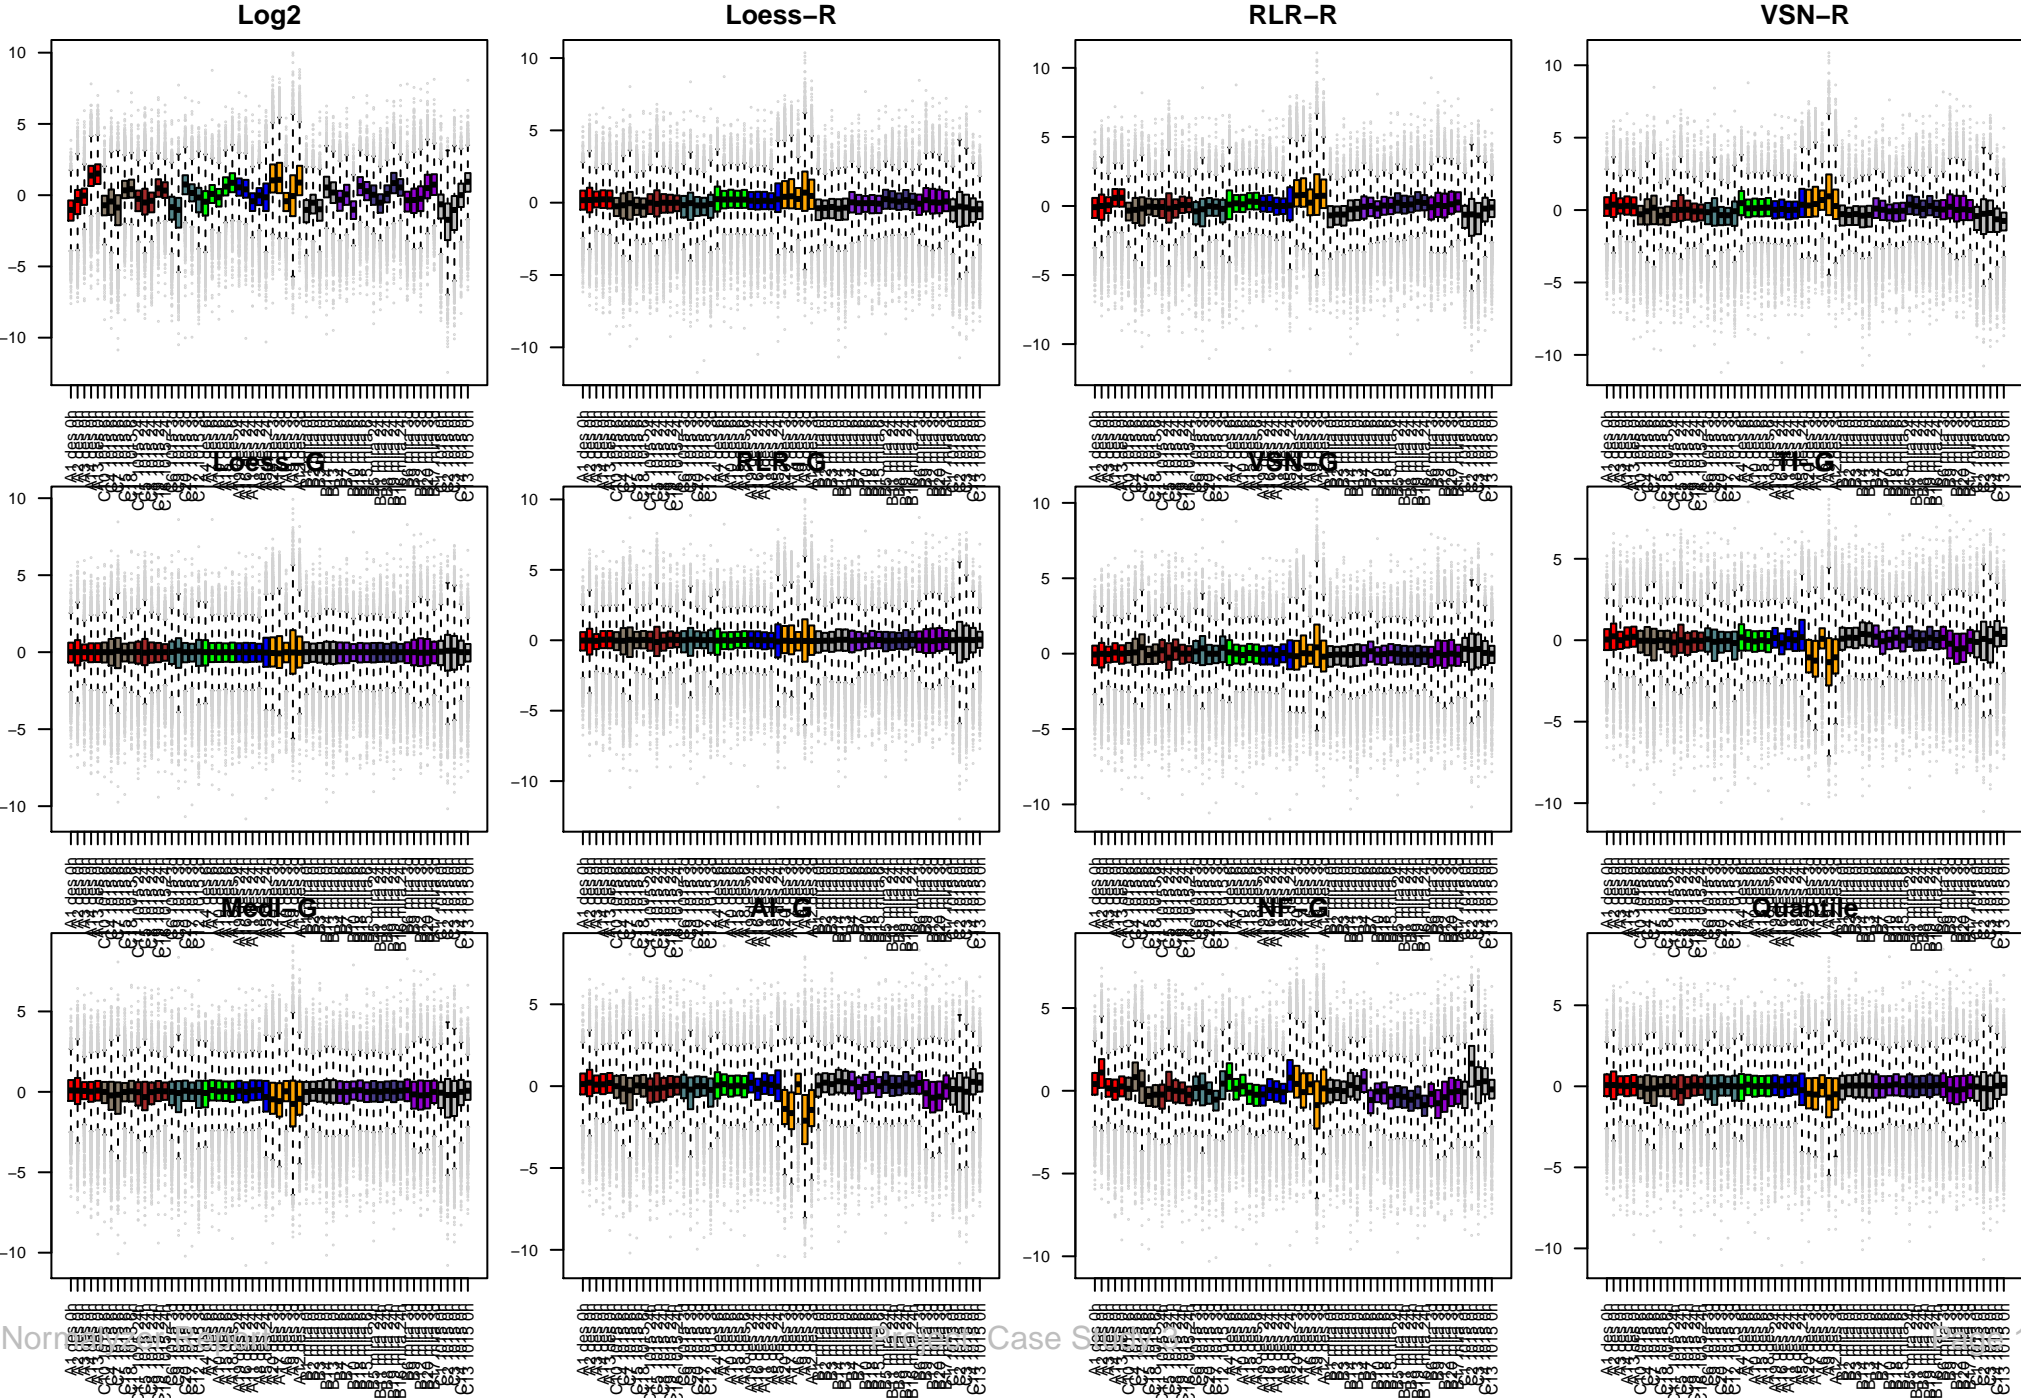

**Log2**

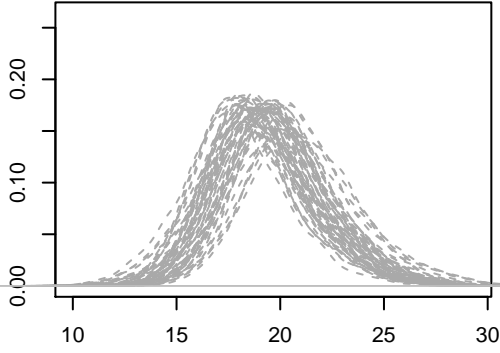

**Loess-R**

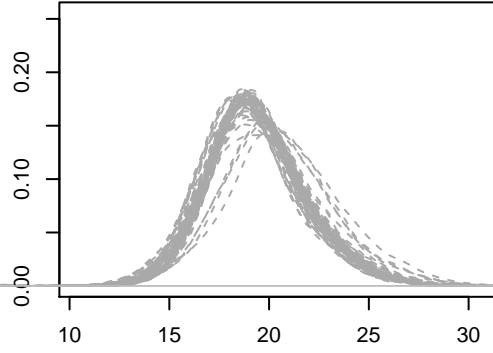

**RLR-R**

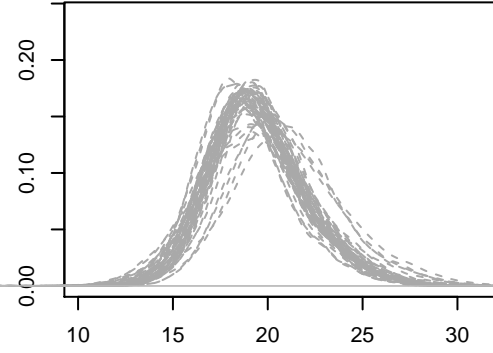

**VSN-R**

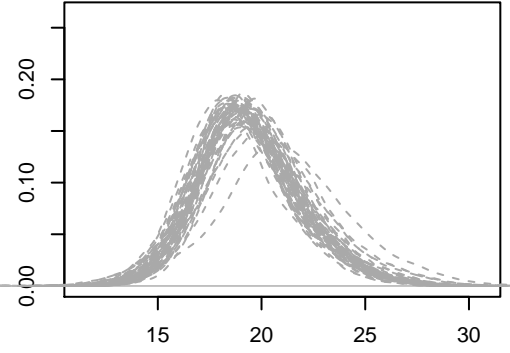

**Loess-G**

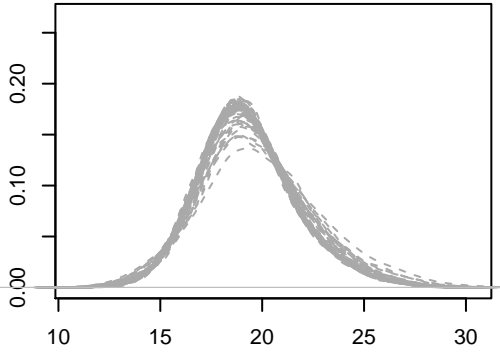

**RLR-G**

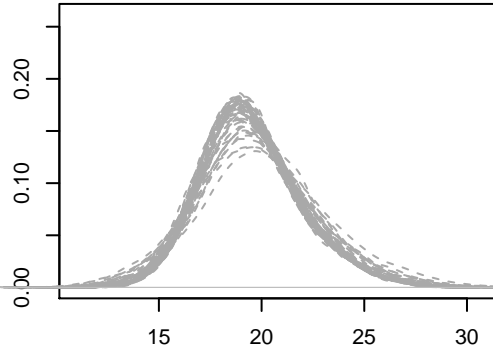

**VSN-G**

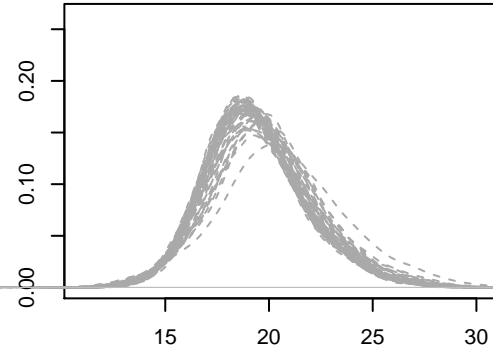

**TI-G**

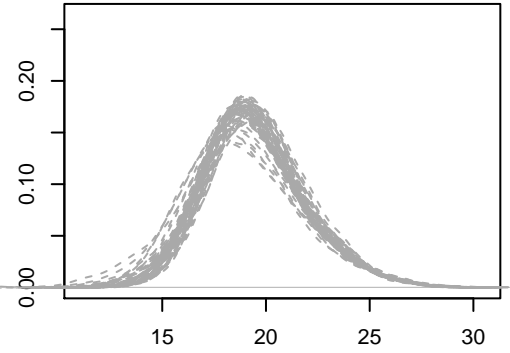

**MedI-G**

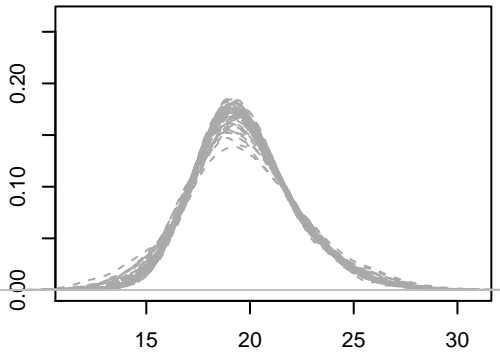

**AI-G**

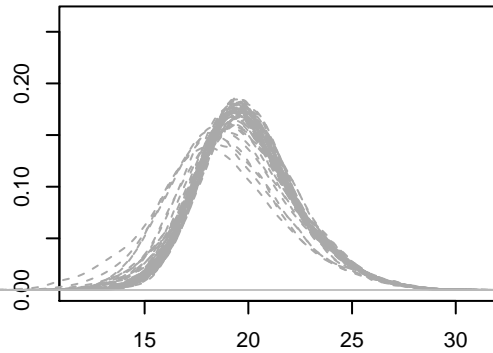

**NF-G**

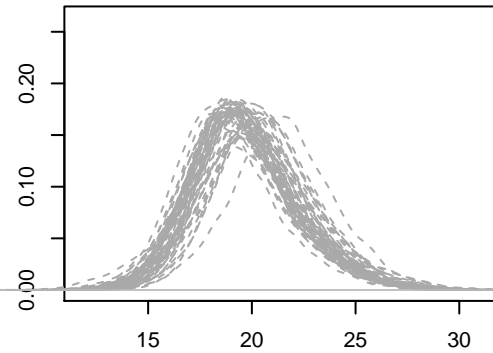

**Quantile**

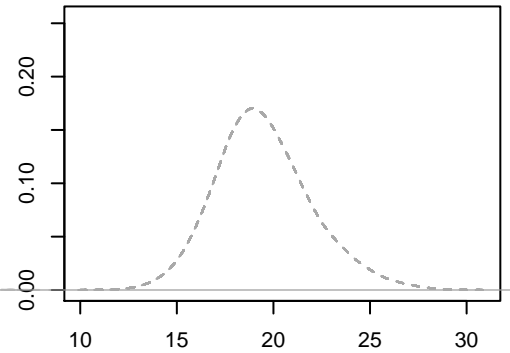

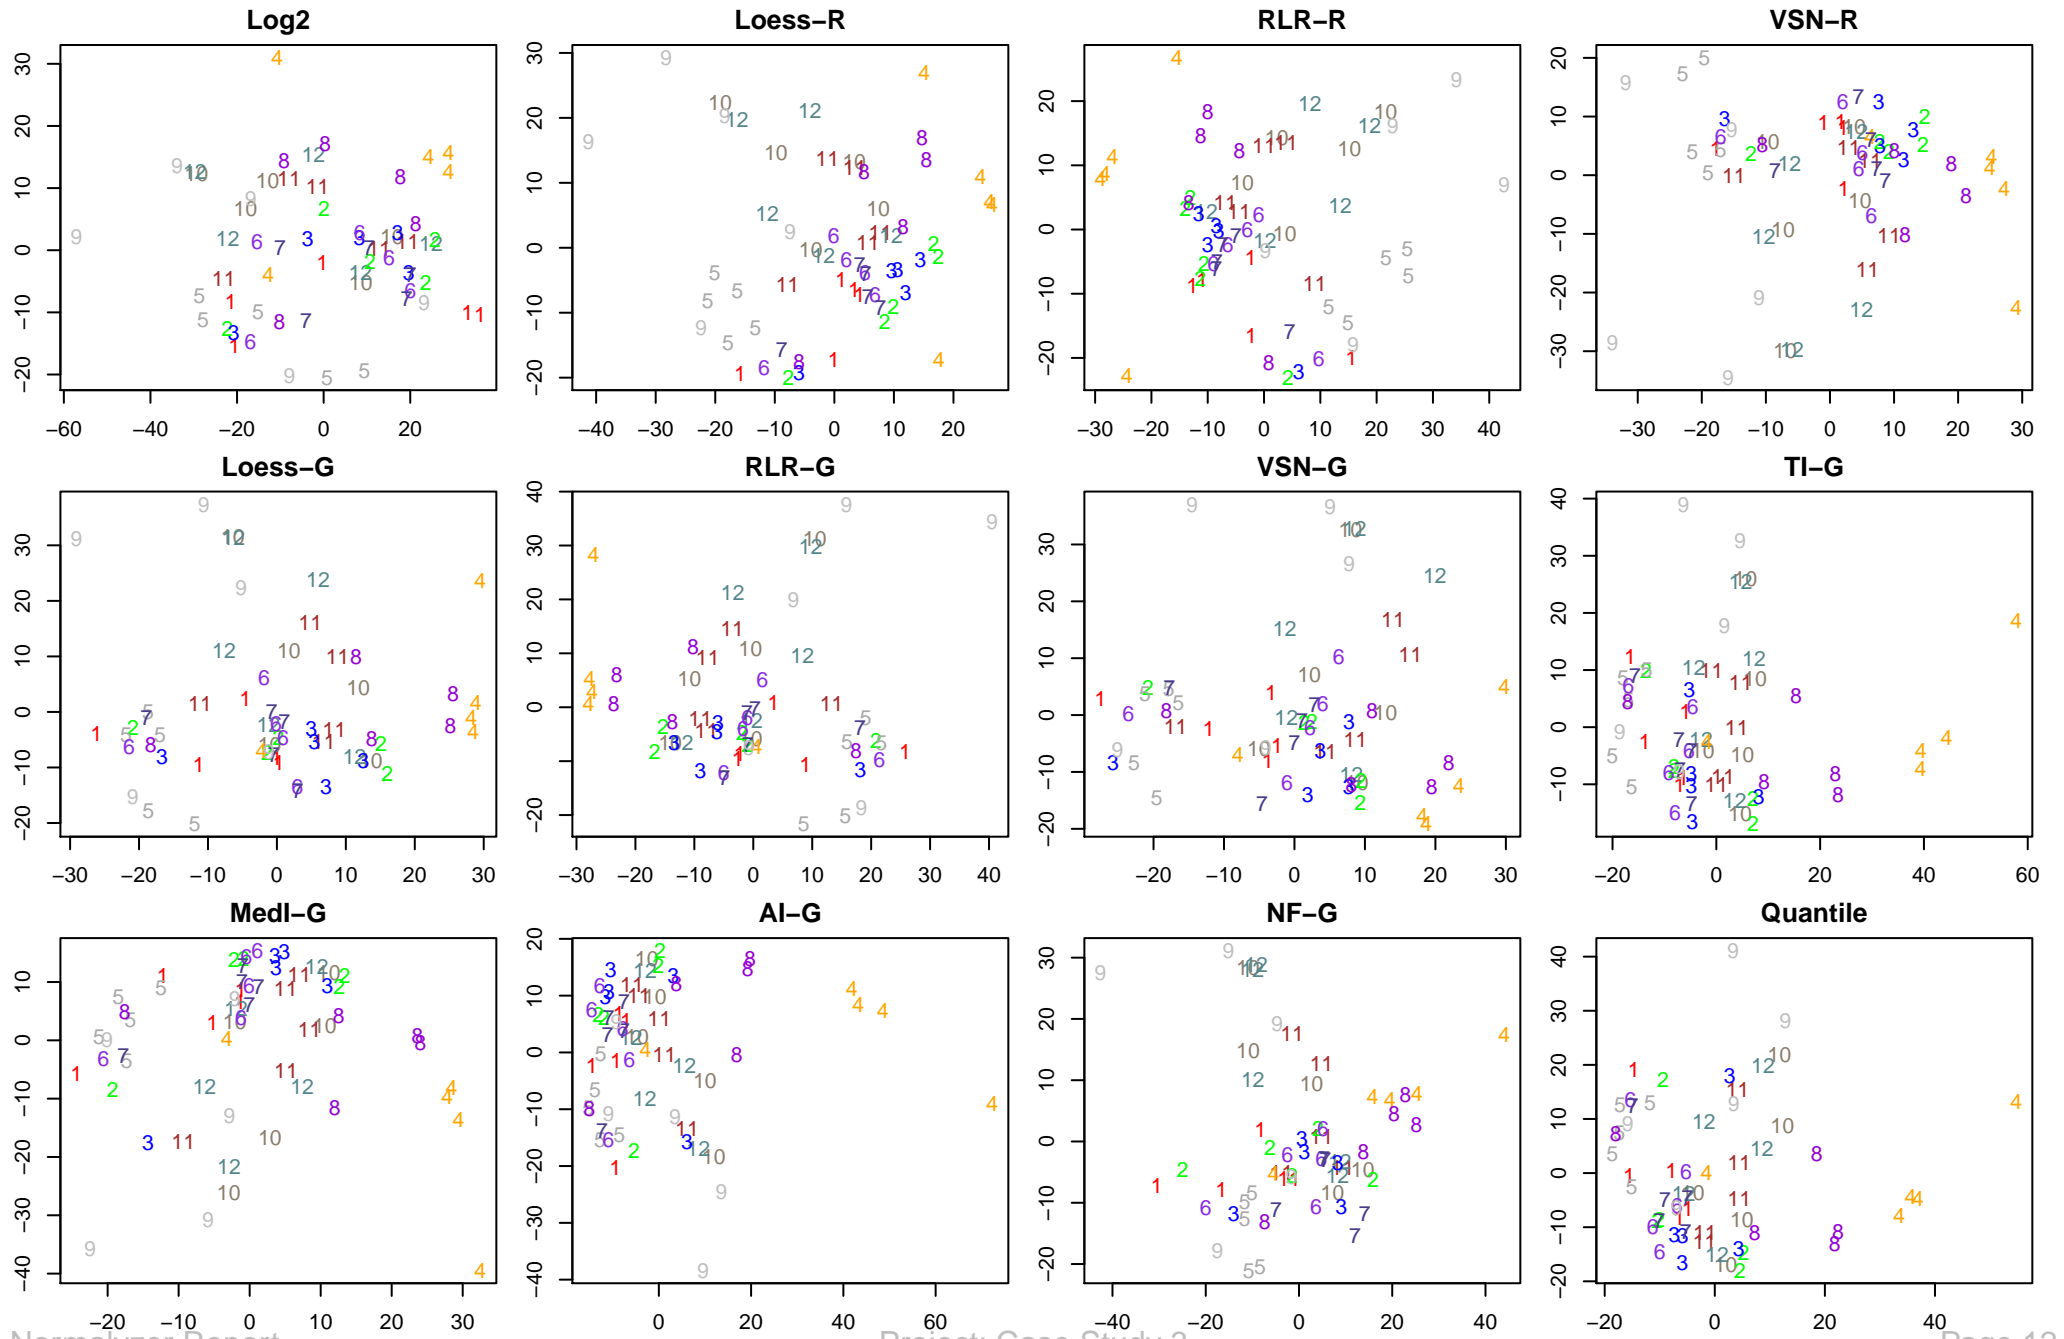

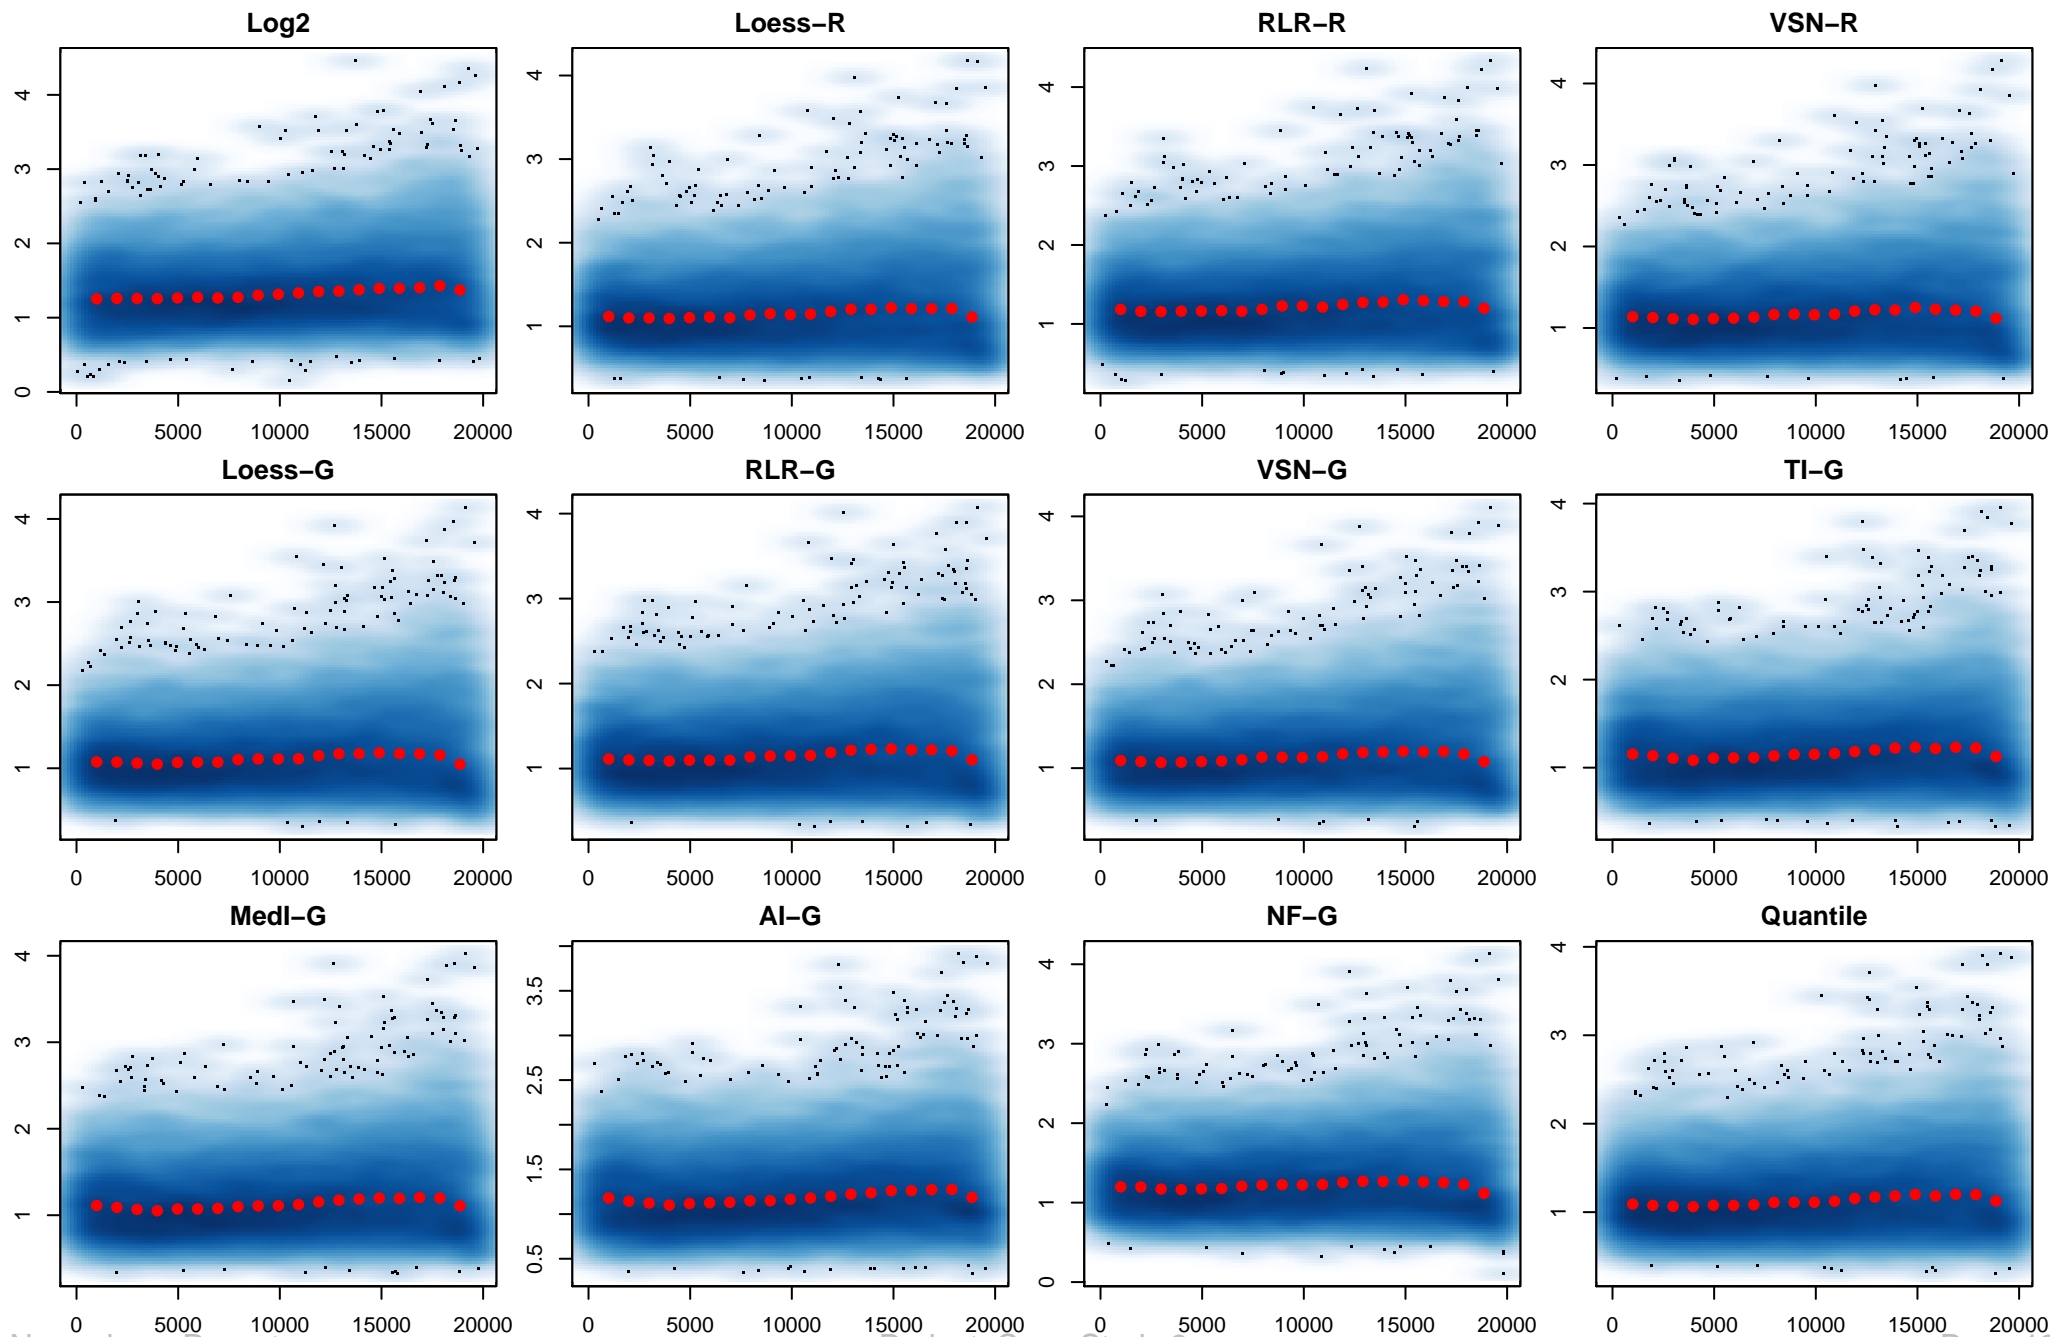

**Pearson correlation – Intragroup**

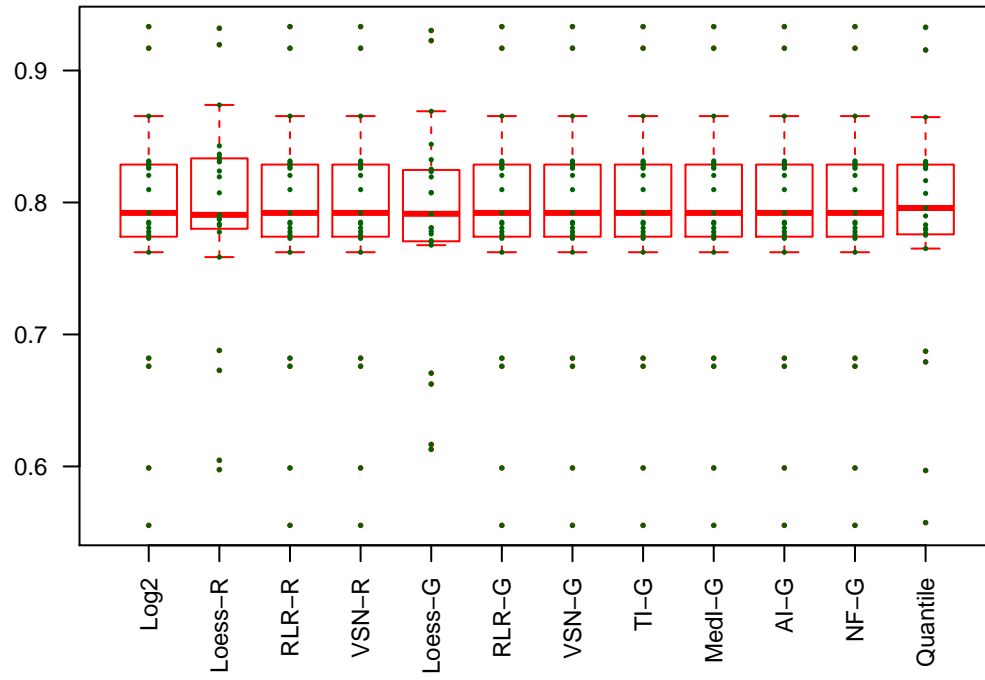

**Spearman correlation – Intragroup**

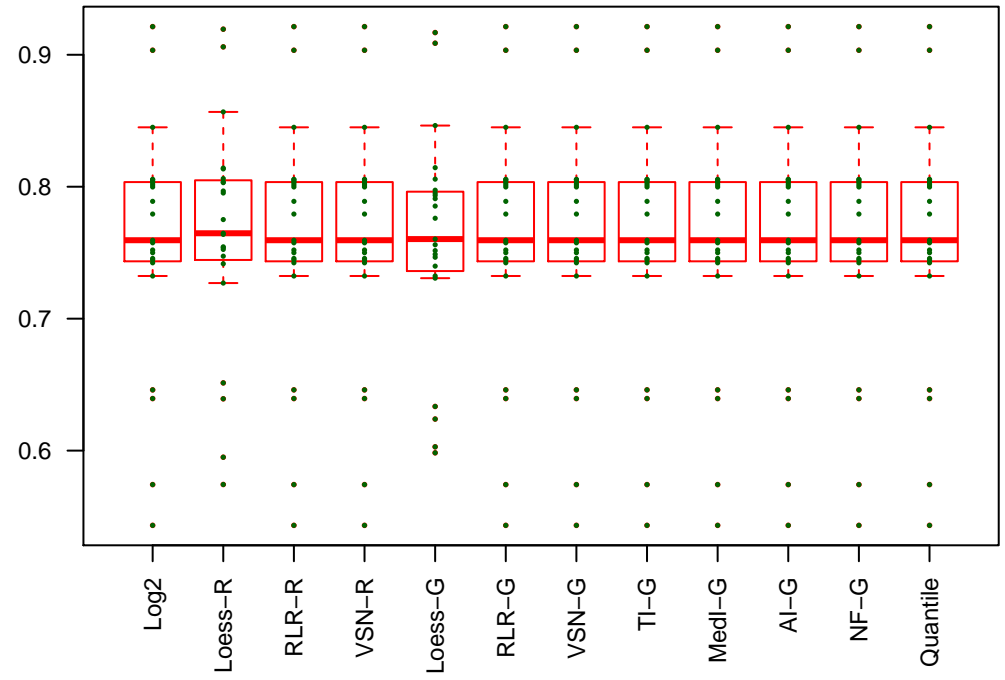

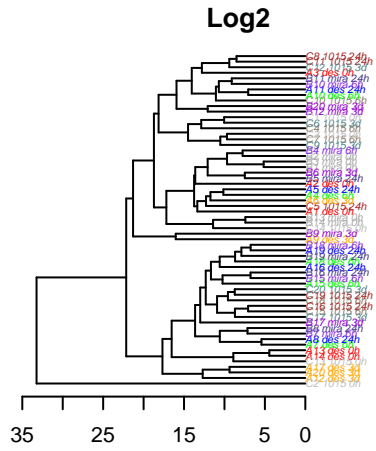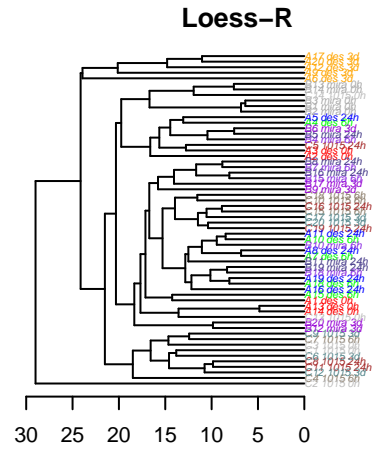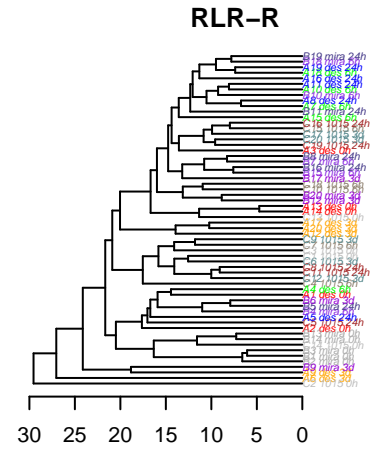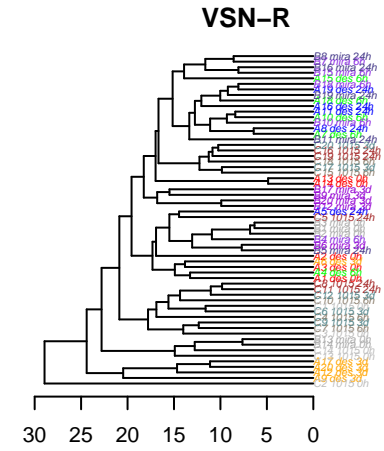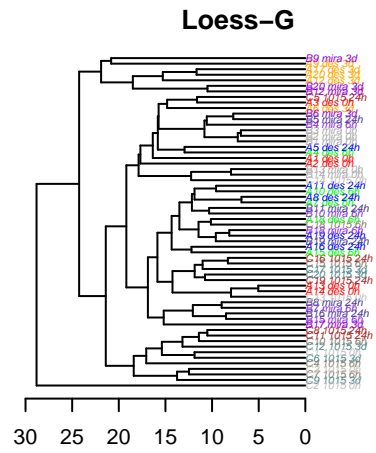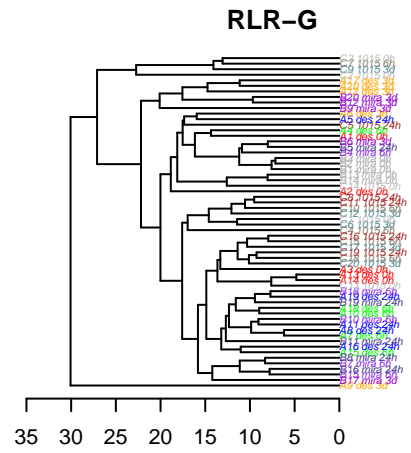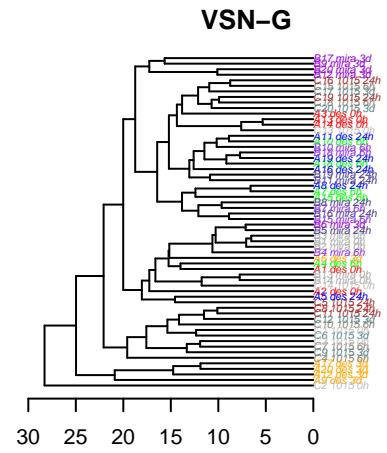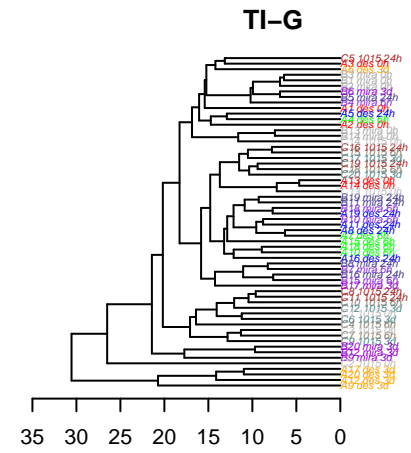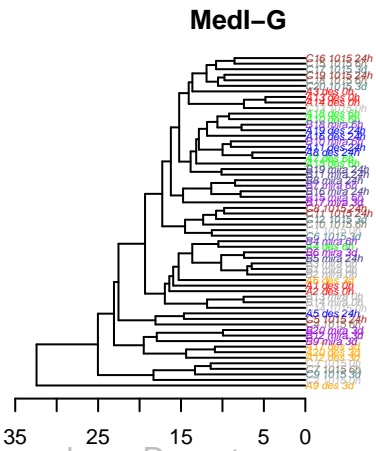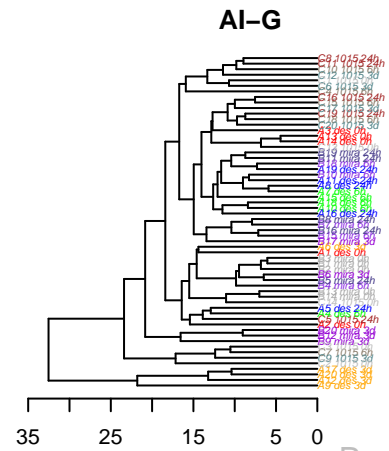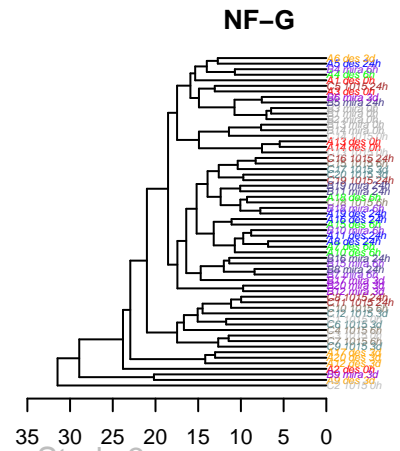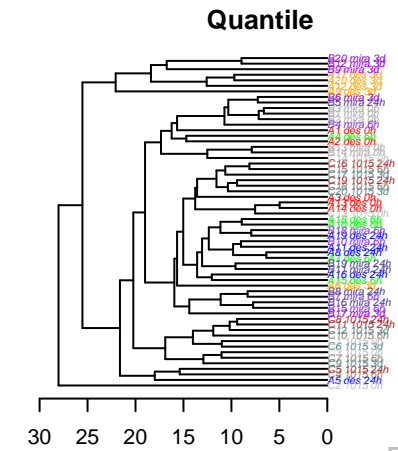

**ANOVA**

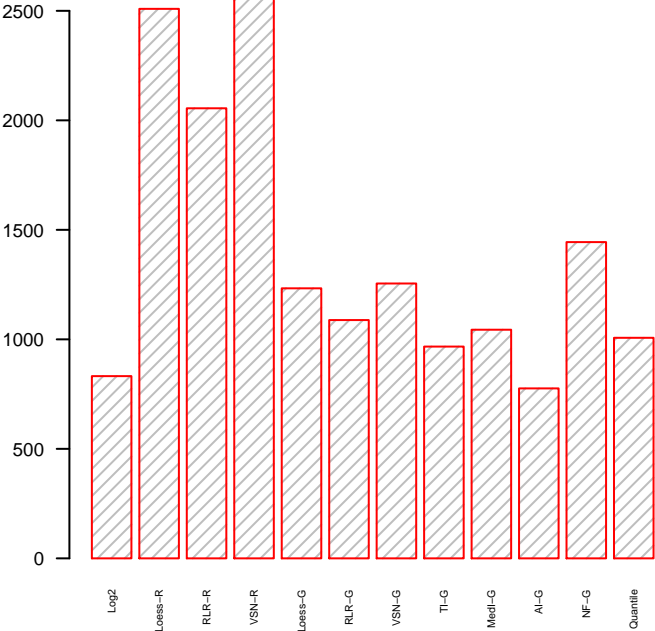

**Kruskal Wallis**

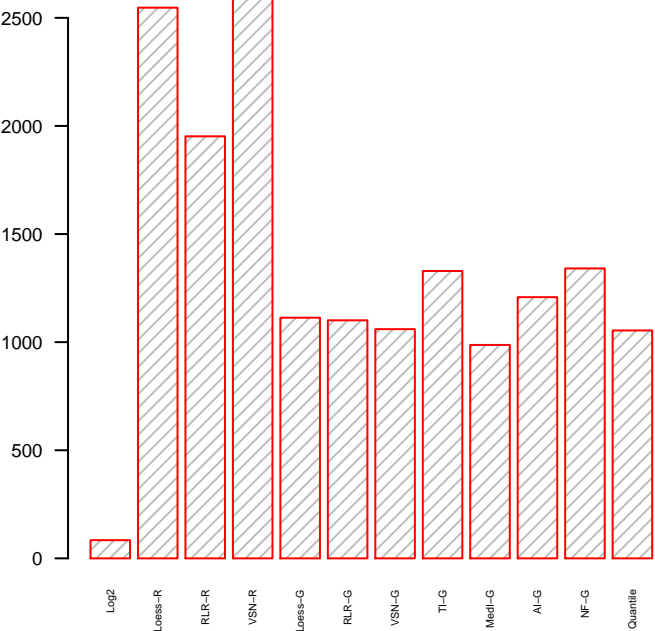

Supplement: pr401264n_si_003.pdf [file pr401264n_si_003.pdf]
